# Supplementary material
Source: publisher figshare collection journal article supplement (https://acs.figshare.com/ndownloader/files/5756349)
Supplement: Supplementary file 1 [file 5756349]

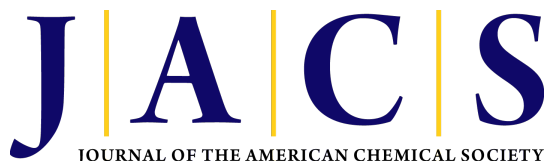

J | A | C | S  
JOURNAL OF THE AMERICAN CHEMICAL SOCIETY

J. Am. Chem. Soc., 1997, 119(51), 12659-12660, DOI: [10.1021/ja972054n](https://doi.org/10.1021/ja972054n)

#### Terms & Conditions

Electronic Supporting Information files are available without a subscription to ACS Web Editions. The American Chemical Society holds a copyright ownership interest in any copyrightable Supporting Information. Files available from the ACS website may be downloaded for personal use only. Users are not otherwise permitted to reproduce, republish, redistribute, or sell any Supporting Information from the ACS website, either in whole or in part, in either machine-readable form or any other form without permission from the American Chemical Society. For permission to reproduce, republish and redistribute this material, requesters must process their own requests via the RightsLink permission system. Information about how to use the RightsLink permission system can be found at <http://pubs.acs.org/page/copyright/permissions.html>

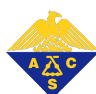

ACS Publications

MOST TRUSTED. MOST CITED. MOST READ.

Copyright © 1997 American Chemical Society

JA972054N

INTEGRAL

HERTZ

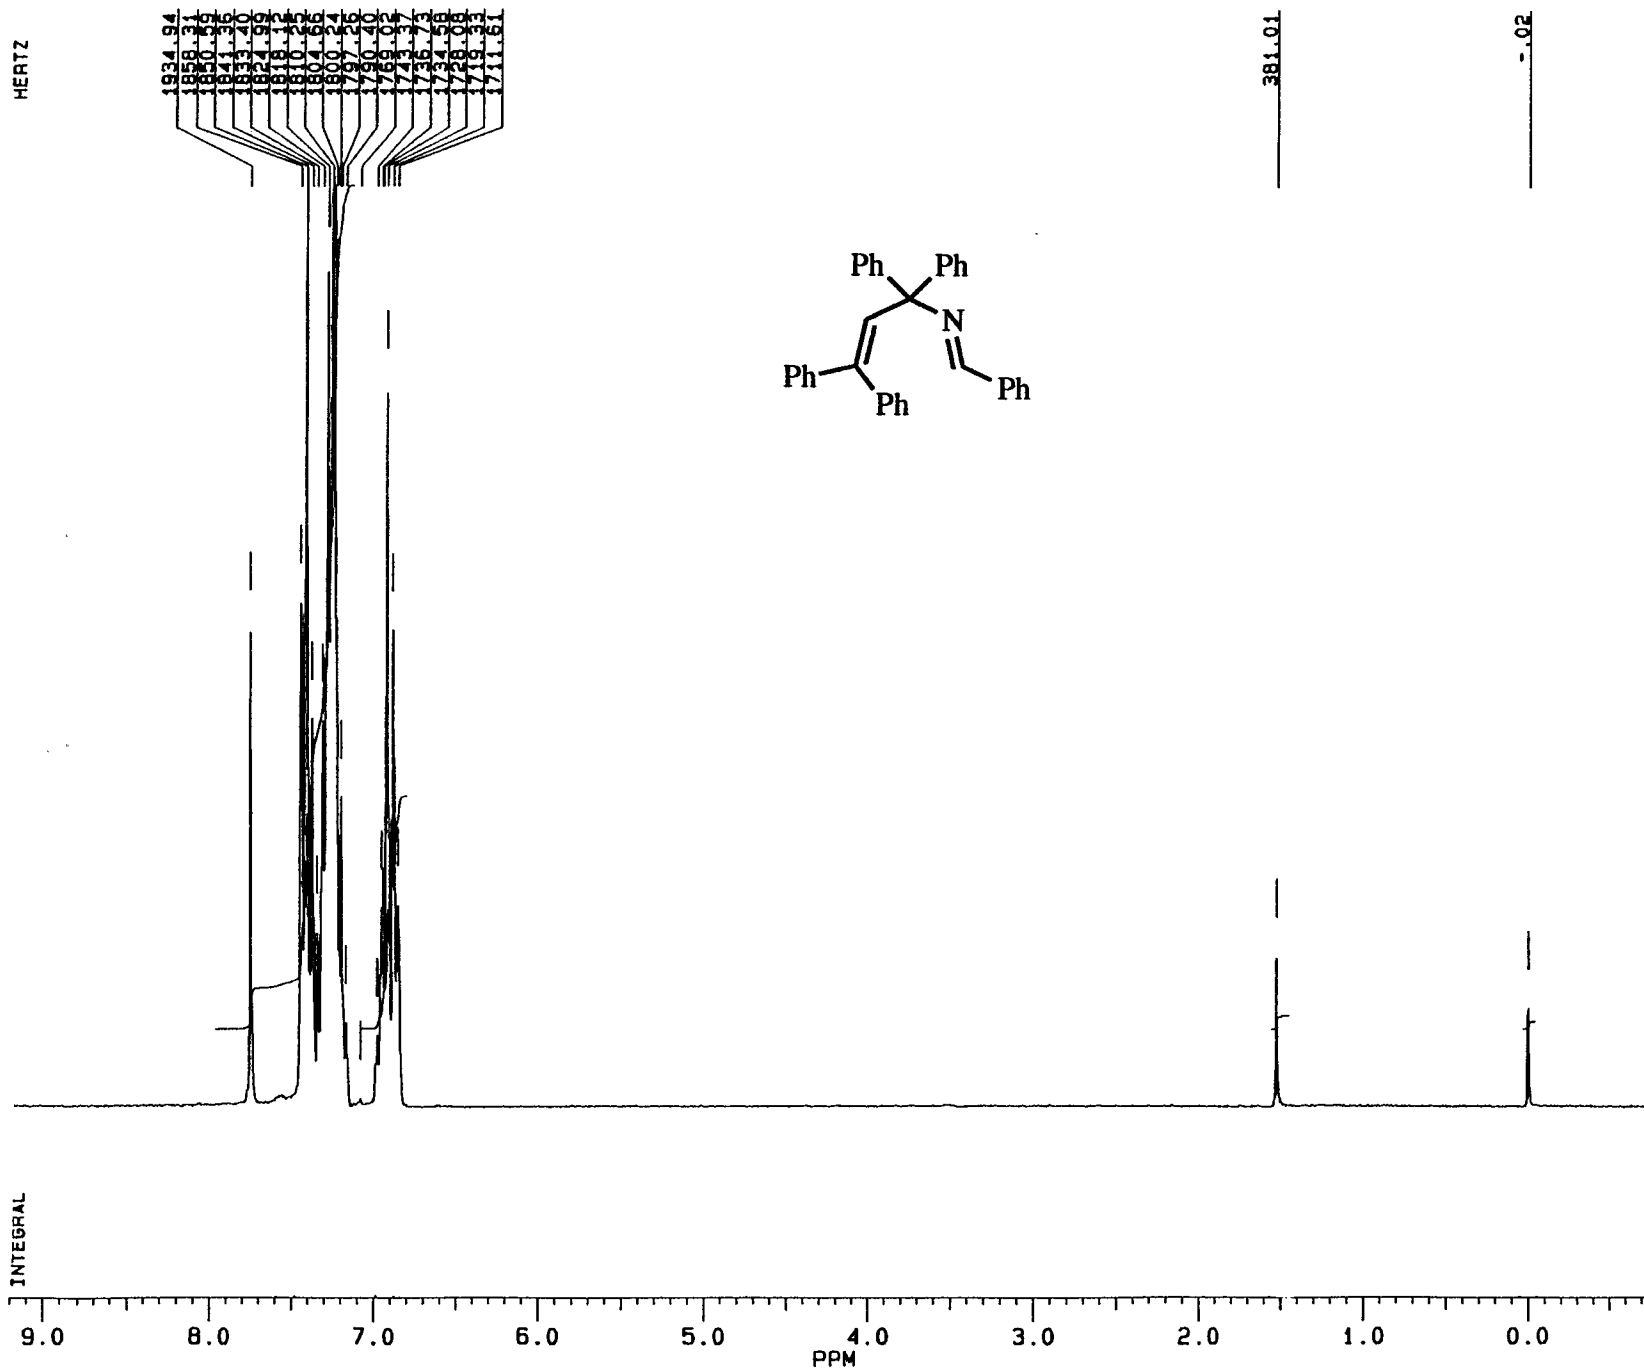

PPM

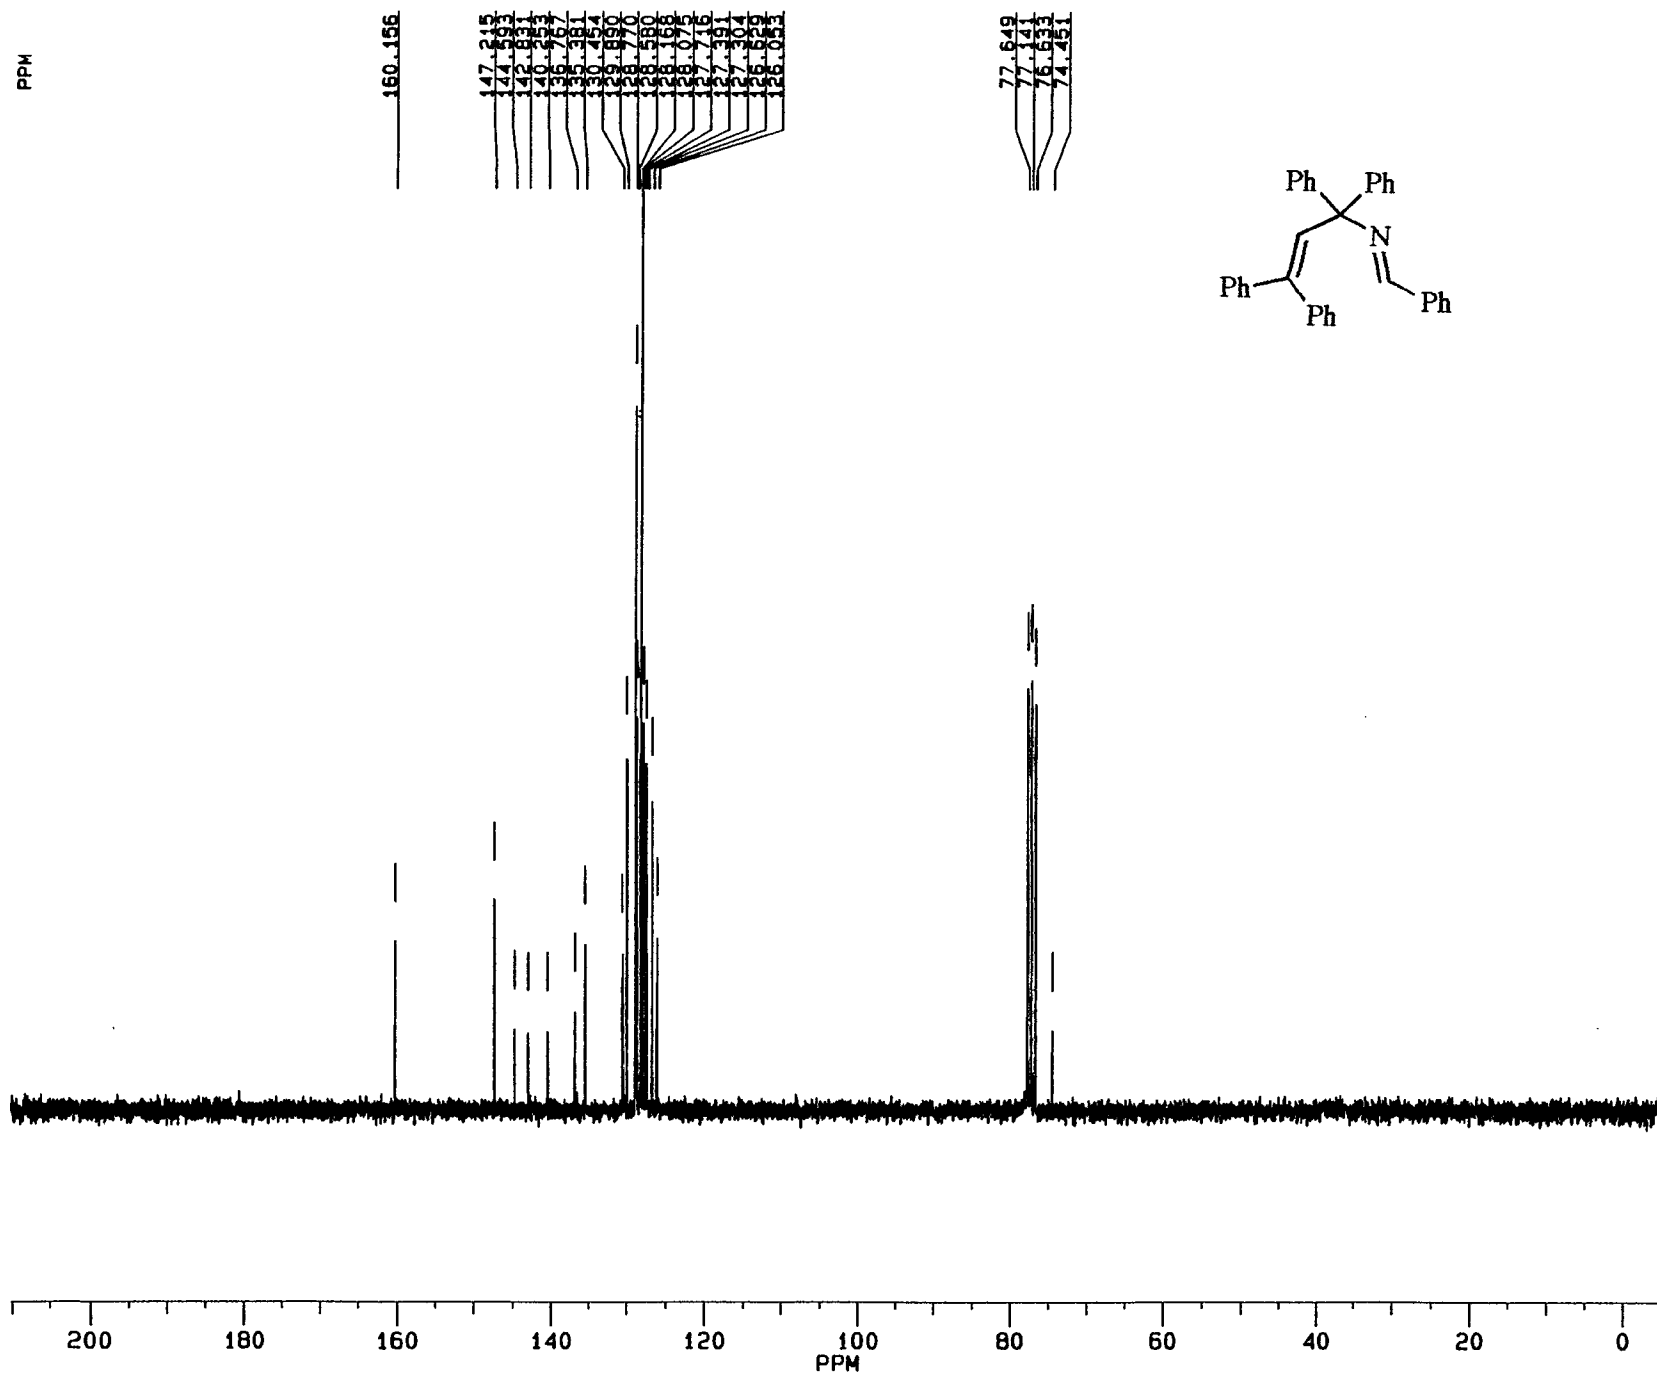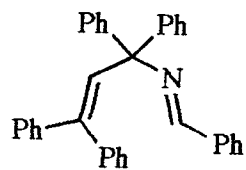

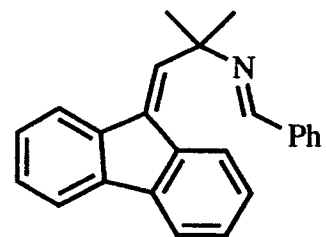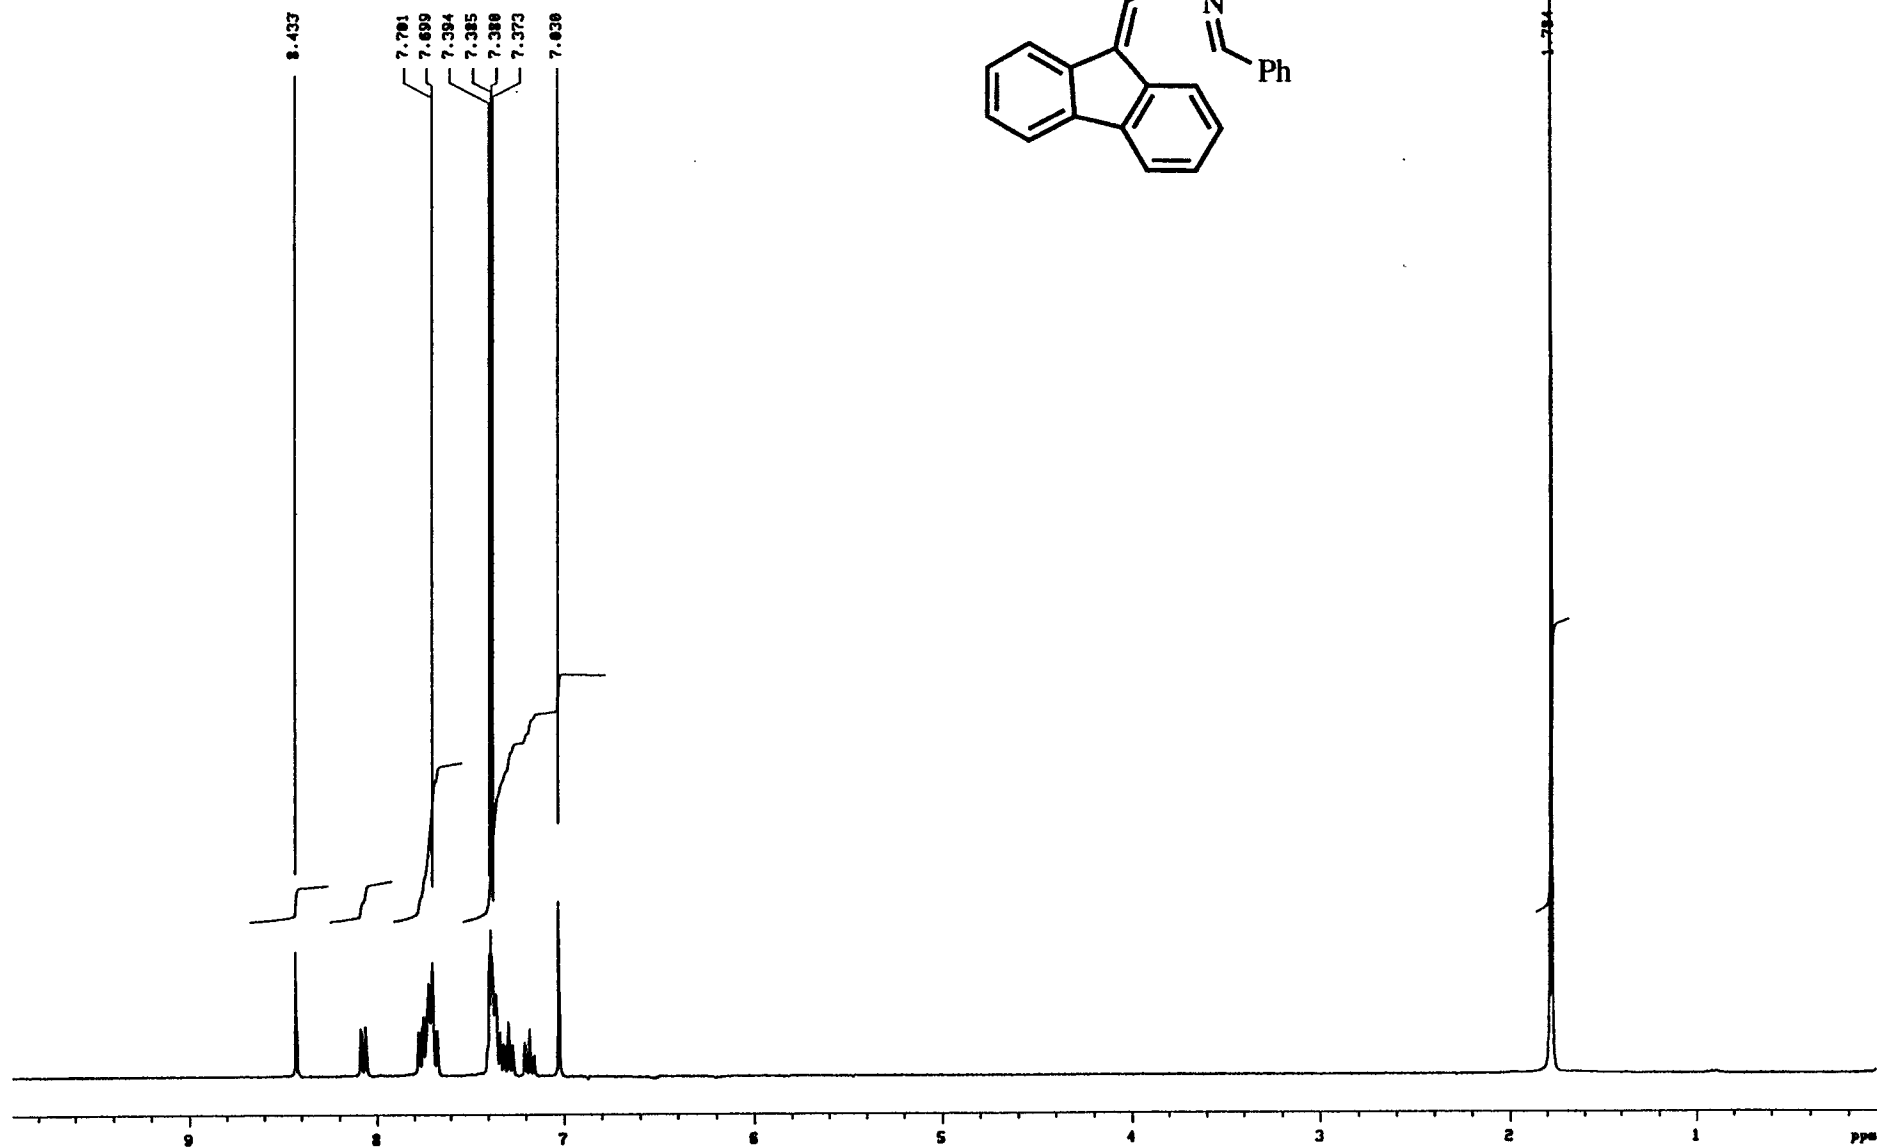

PPM

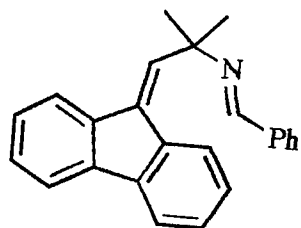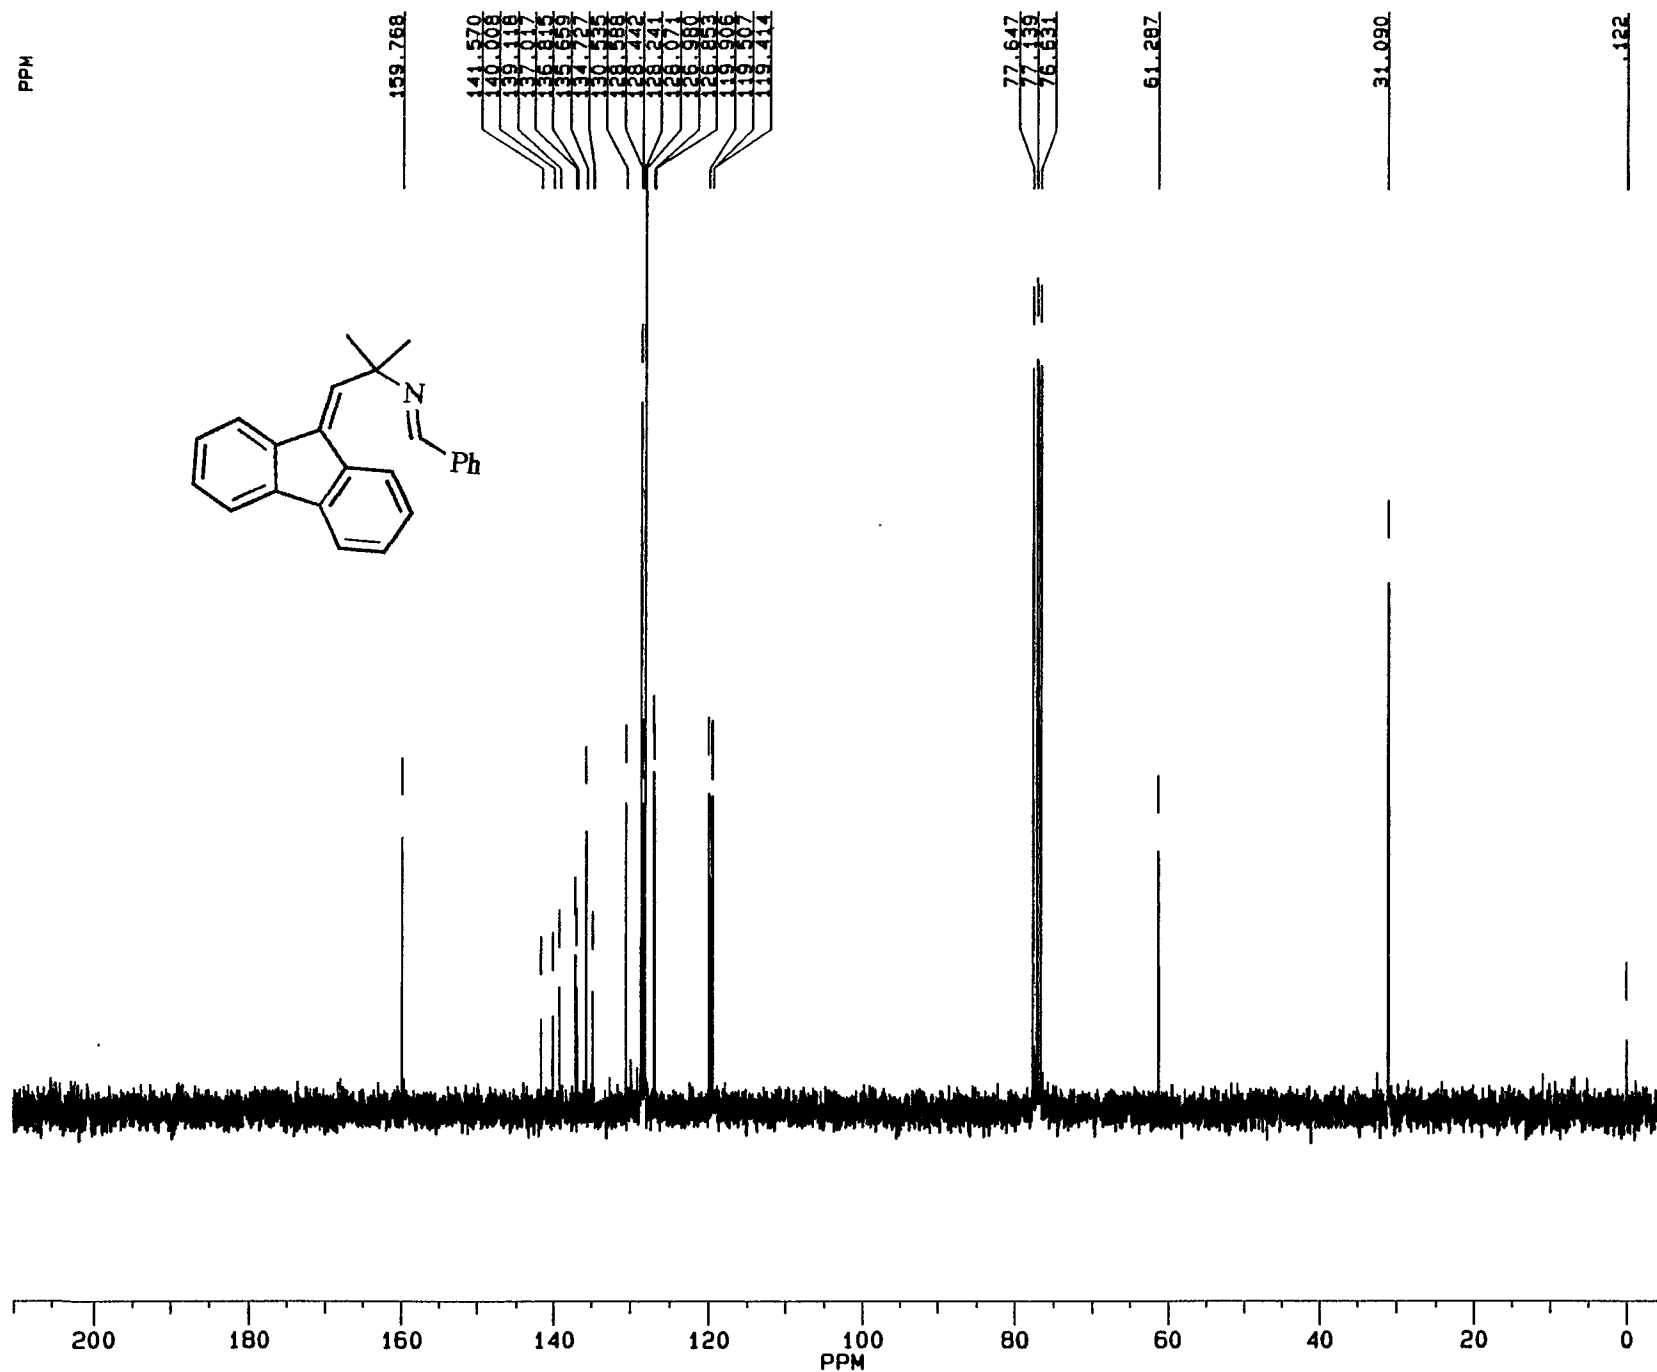

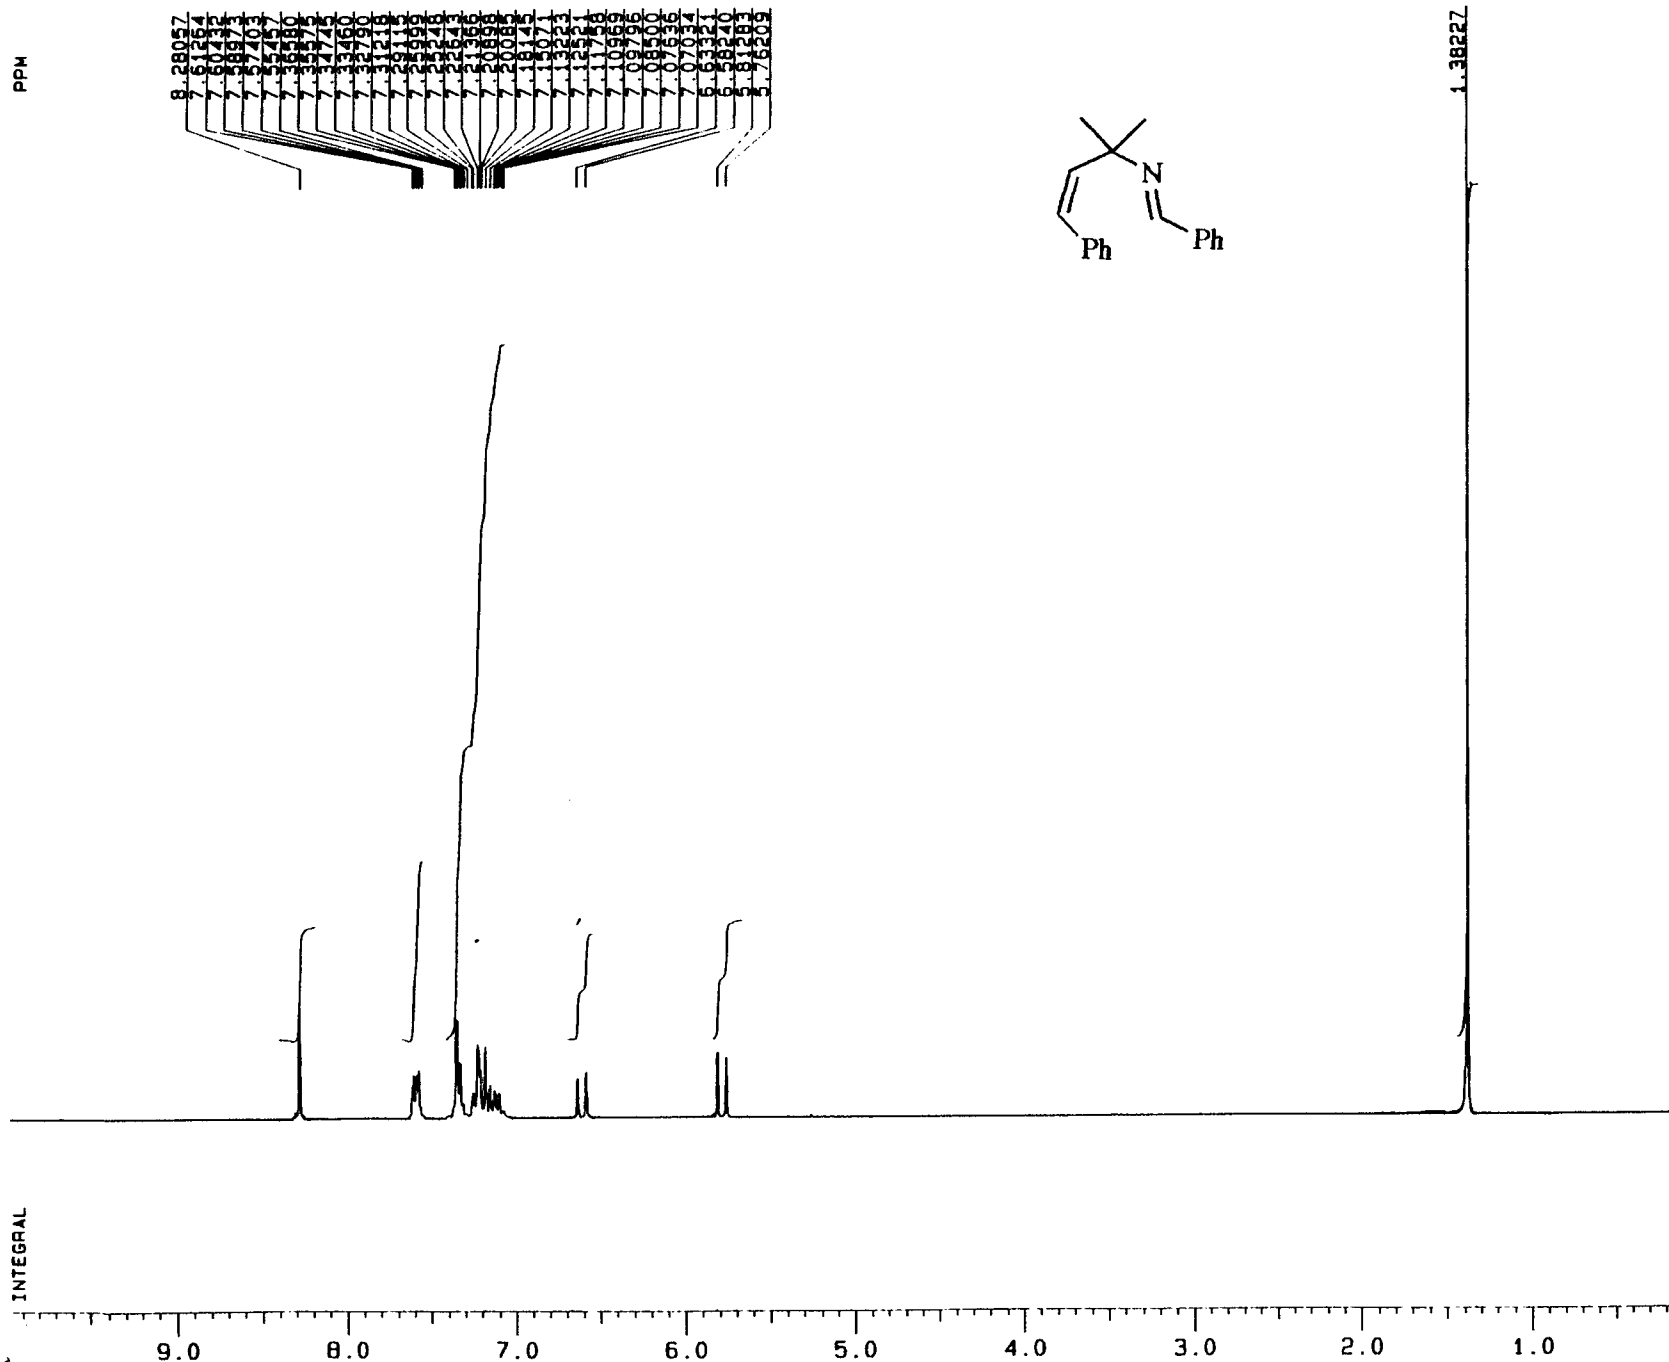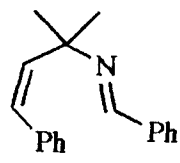

PPM

157.731

138.646

137.893

137.871

130.553

130.186

129.262

128.473

128.101

127.785

126.624

77.576

77.168

76.650

61.806

30.174

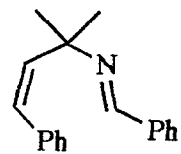

200

180

160

140

120

100  
PPM

80

60

40

20

0

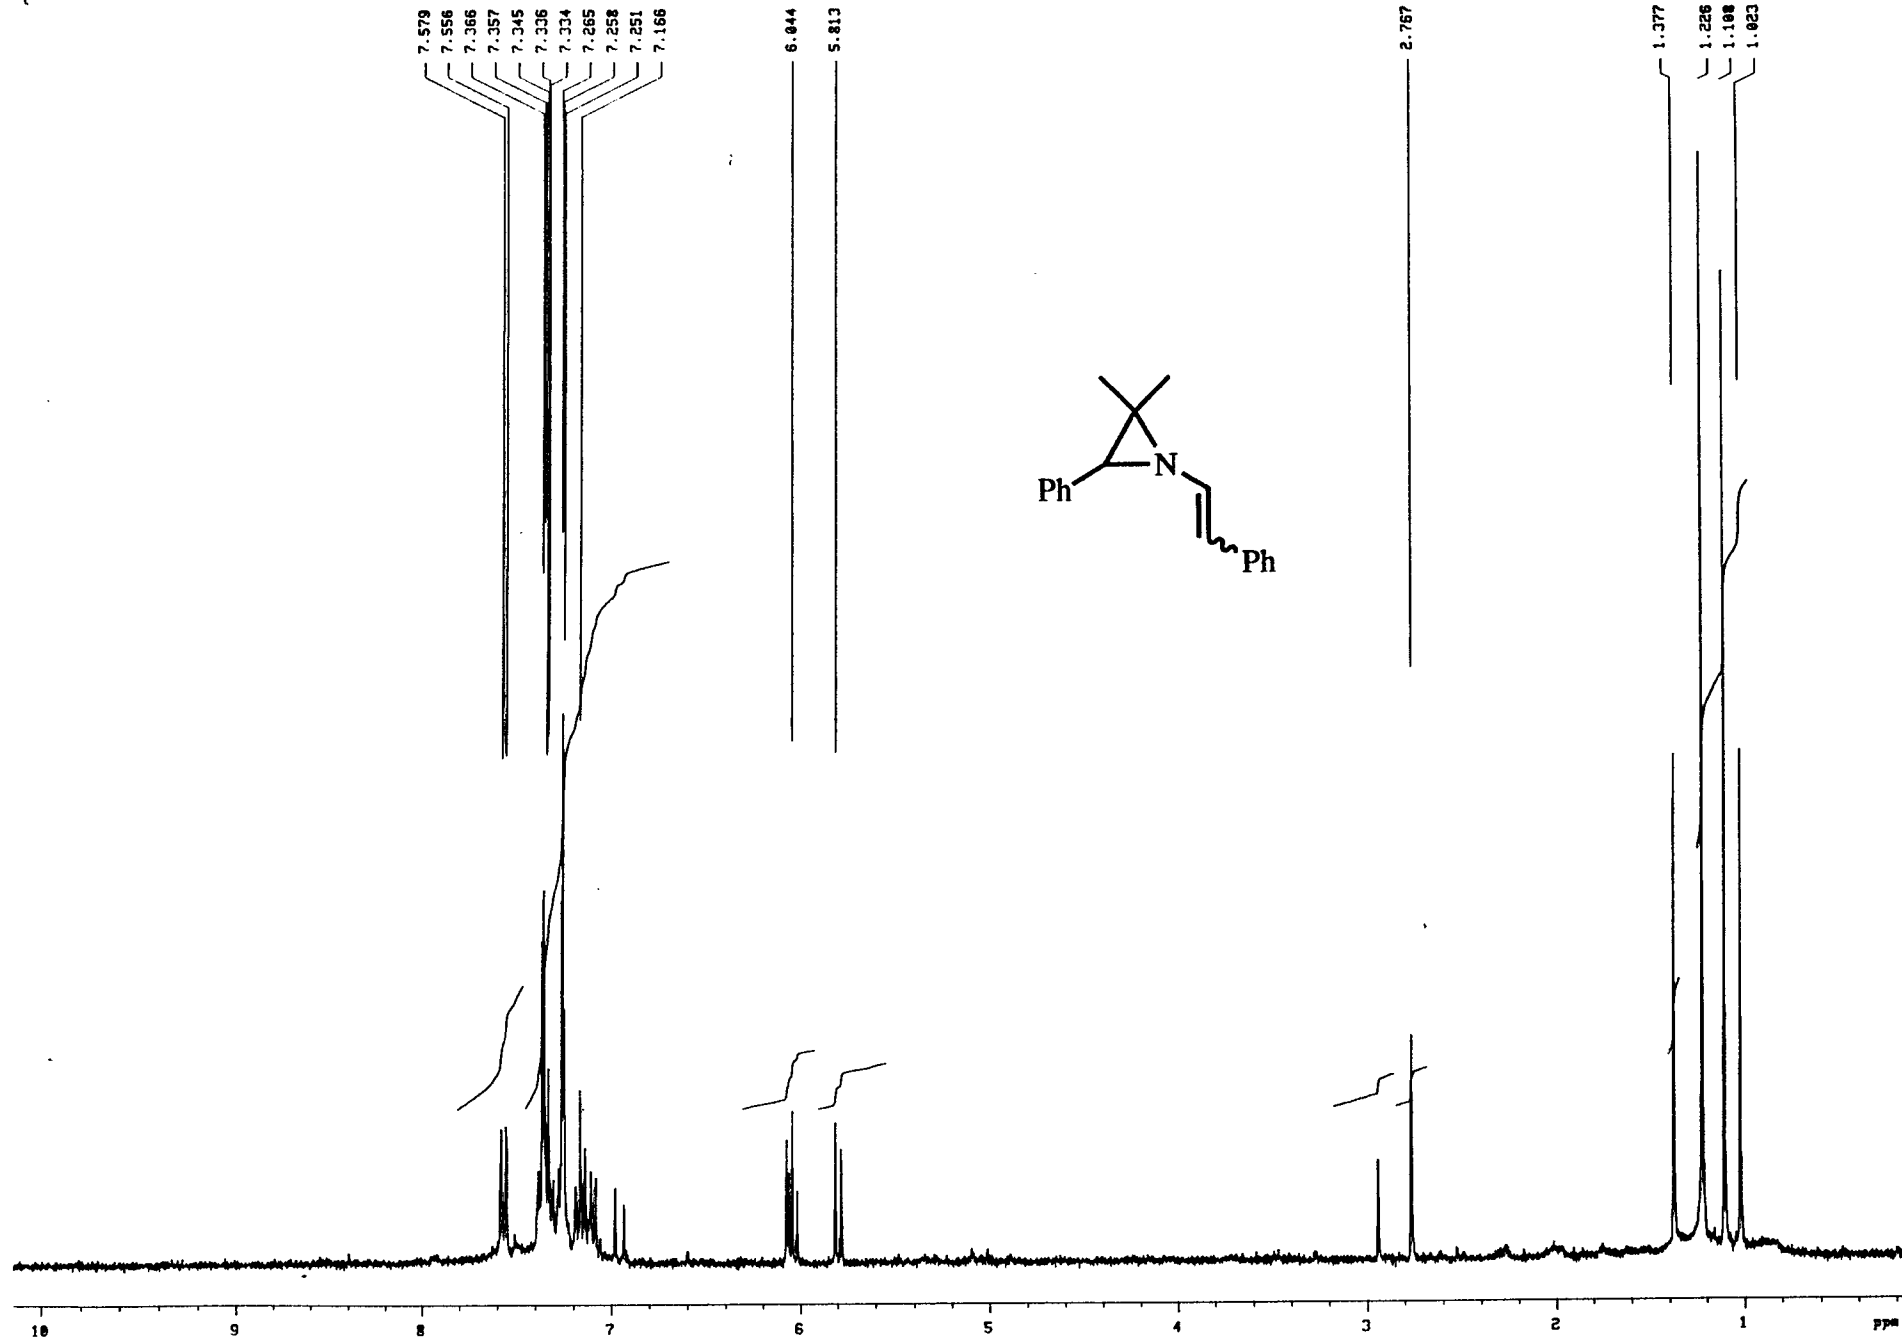



POOR QUALITY ORIGINAL

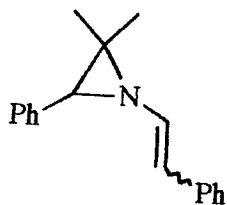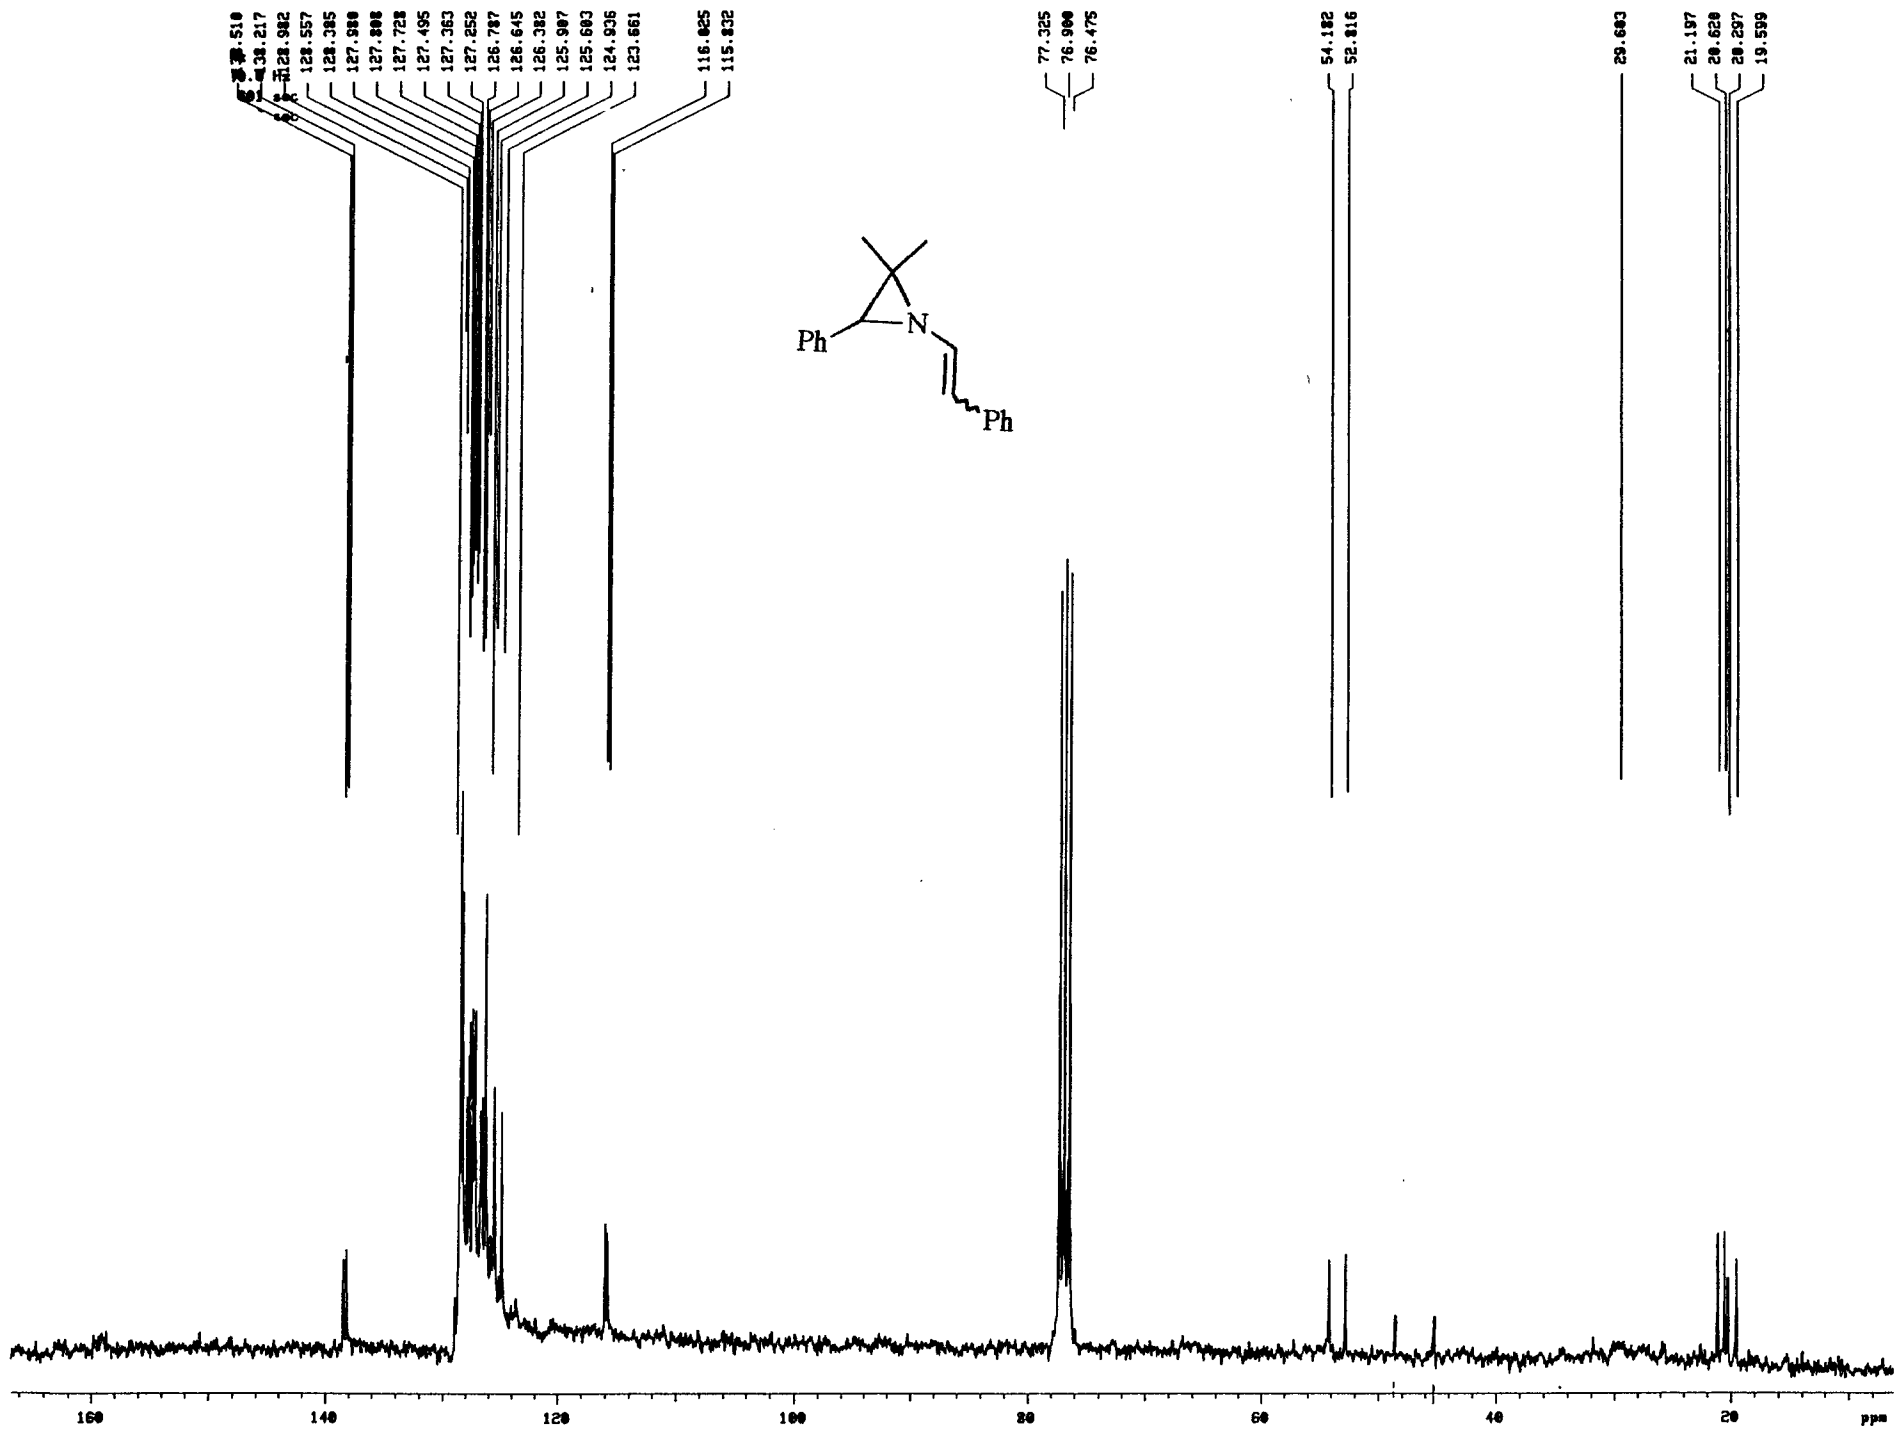

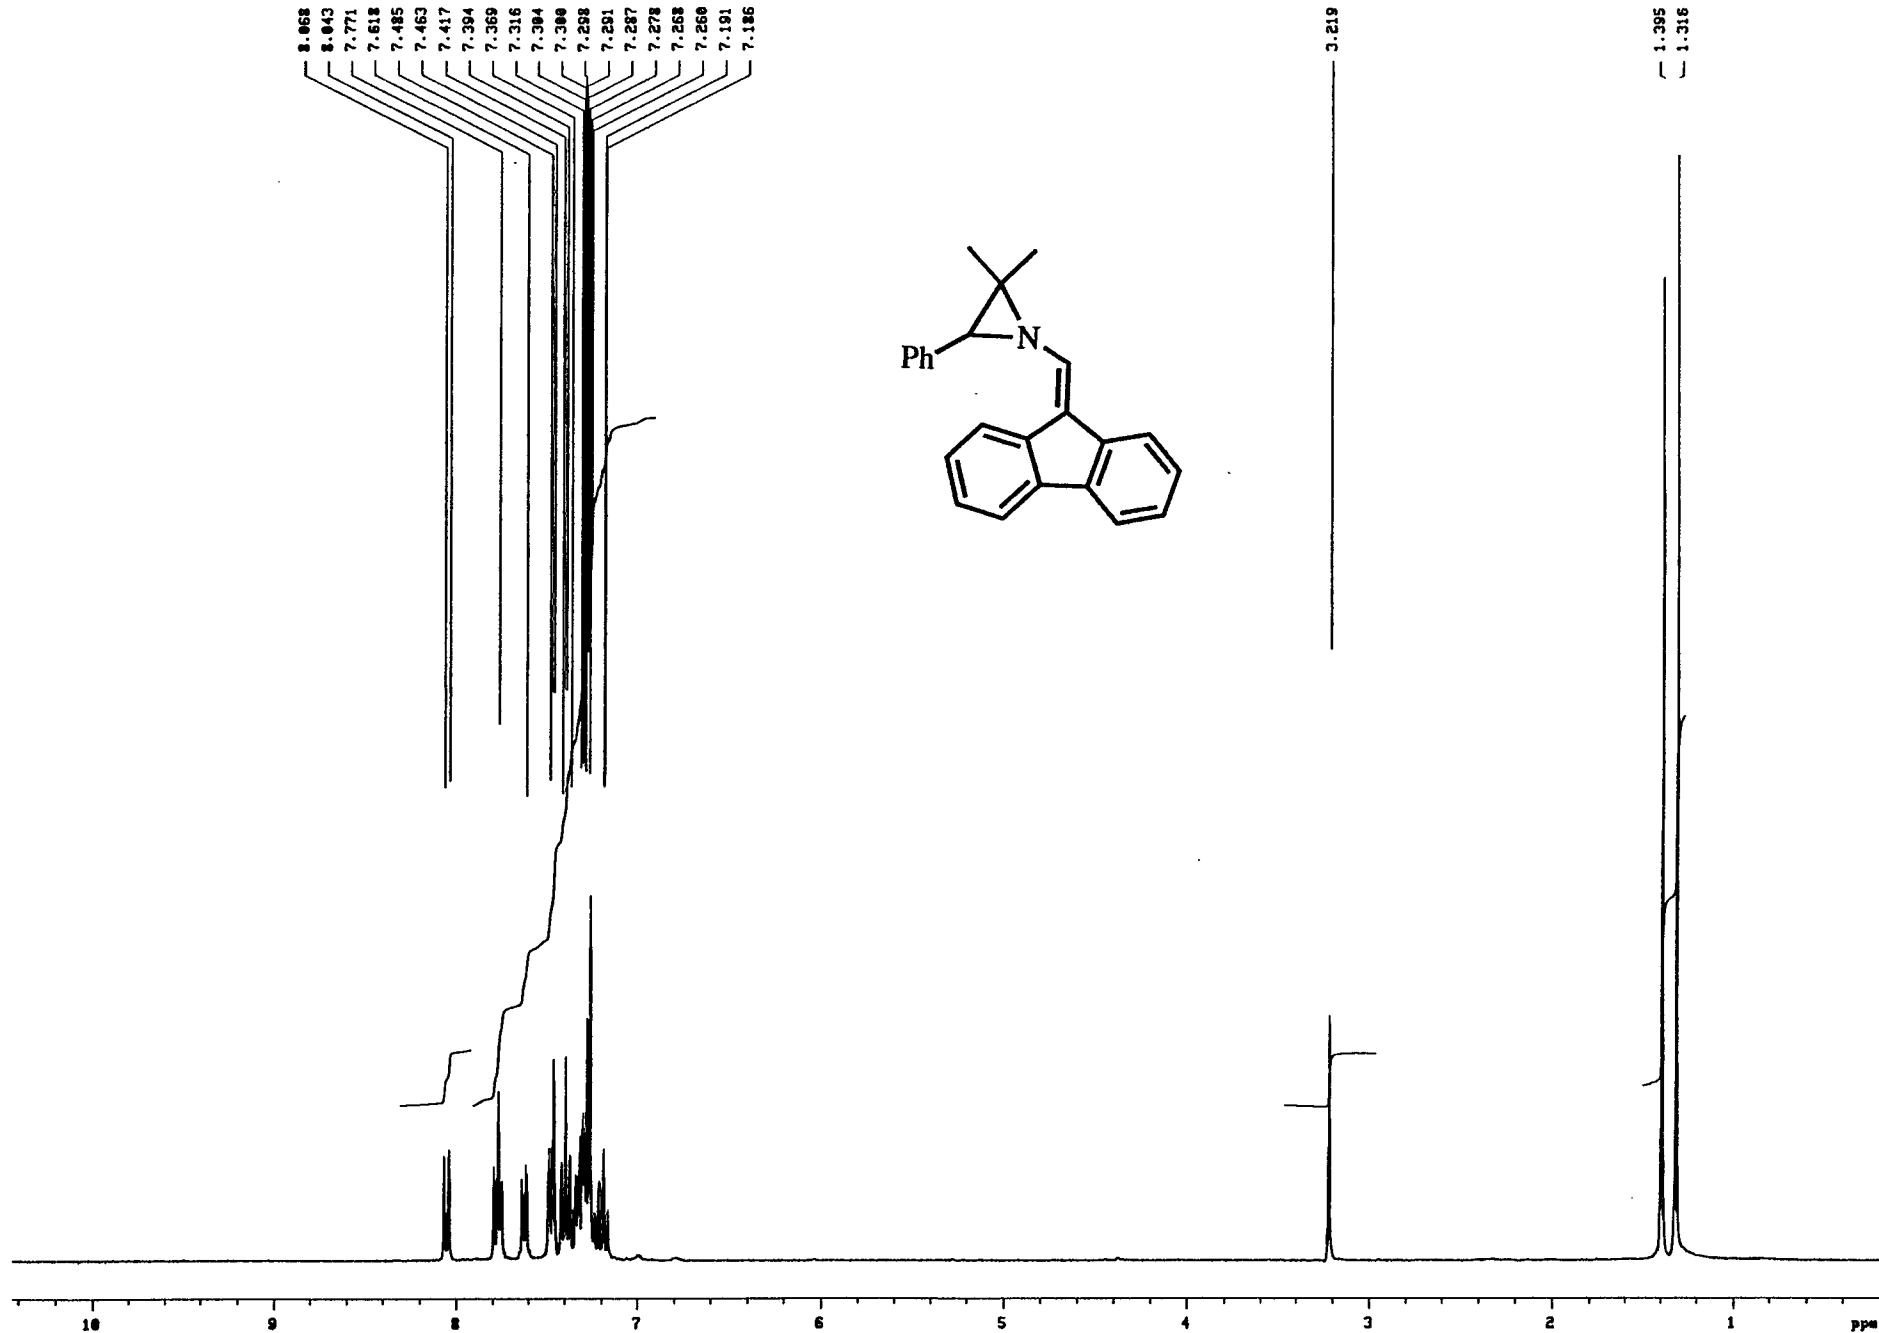

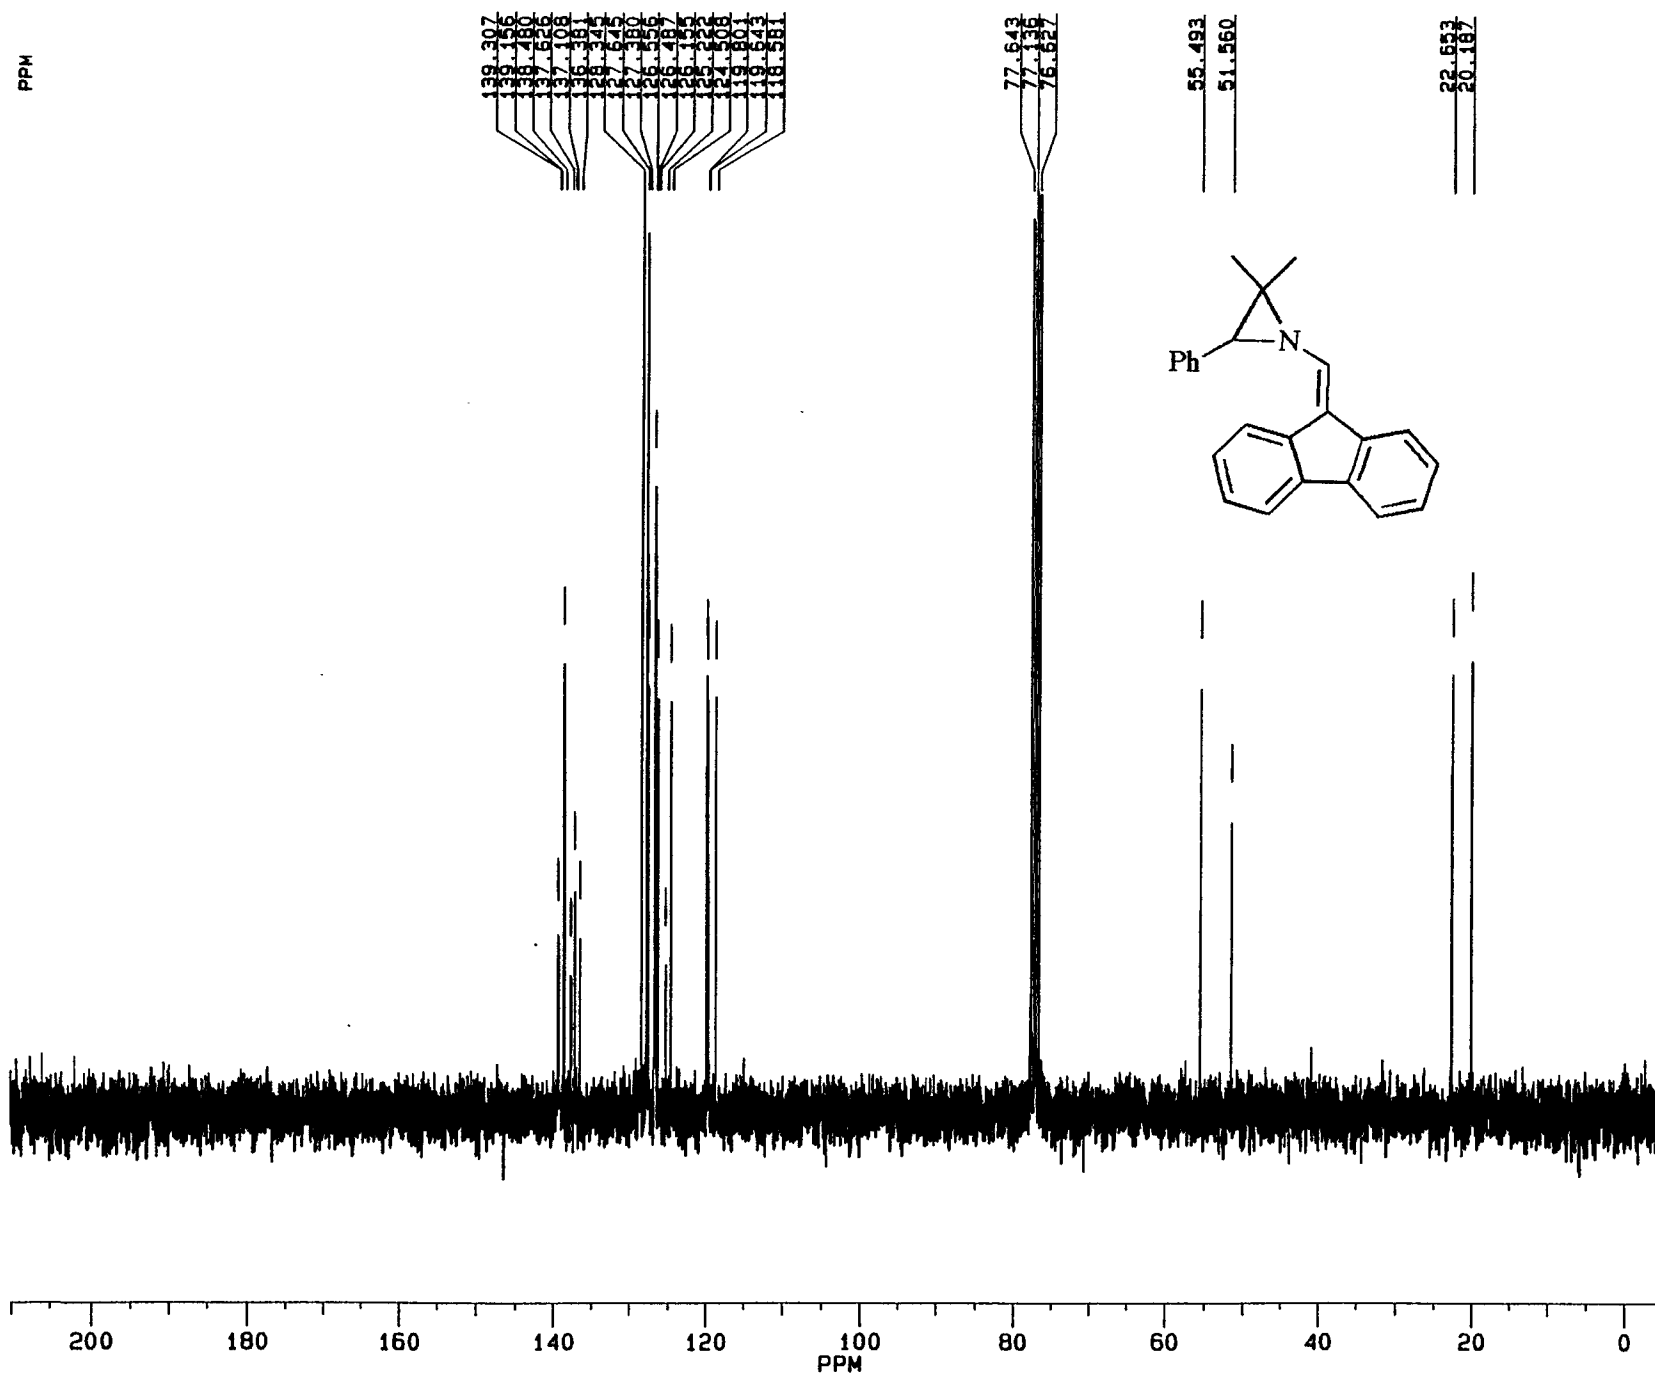

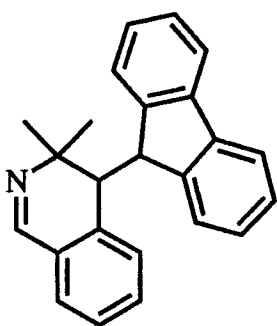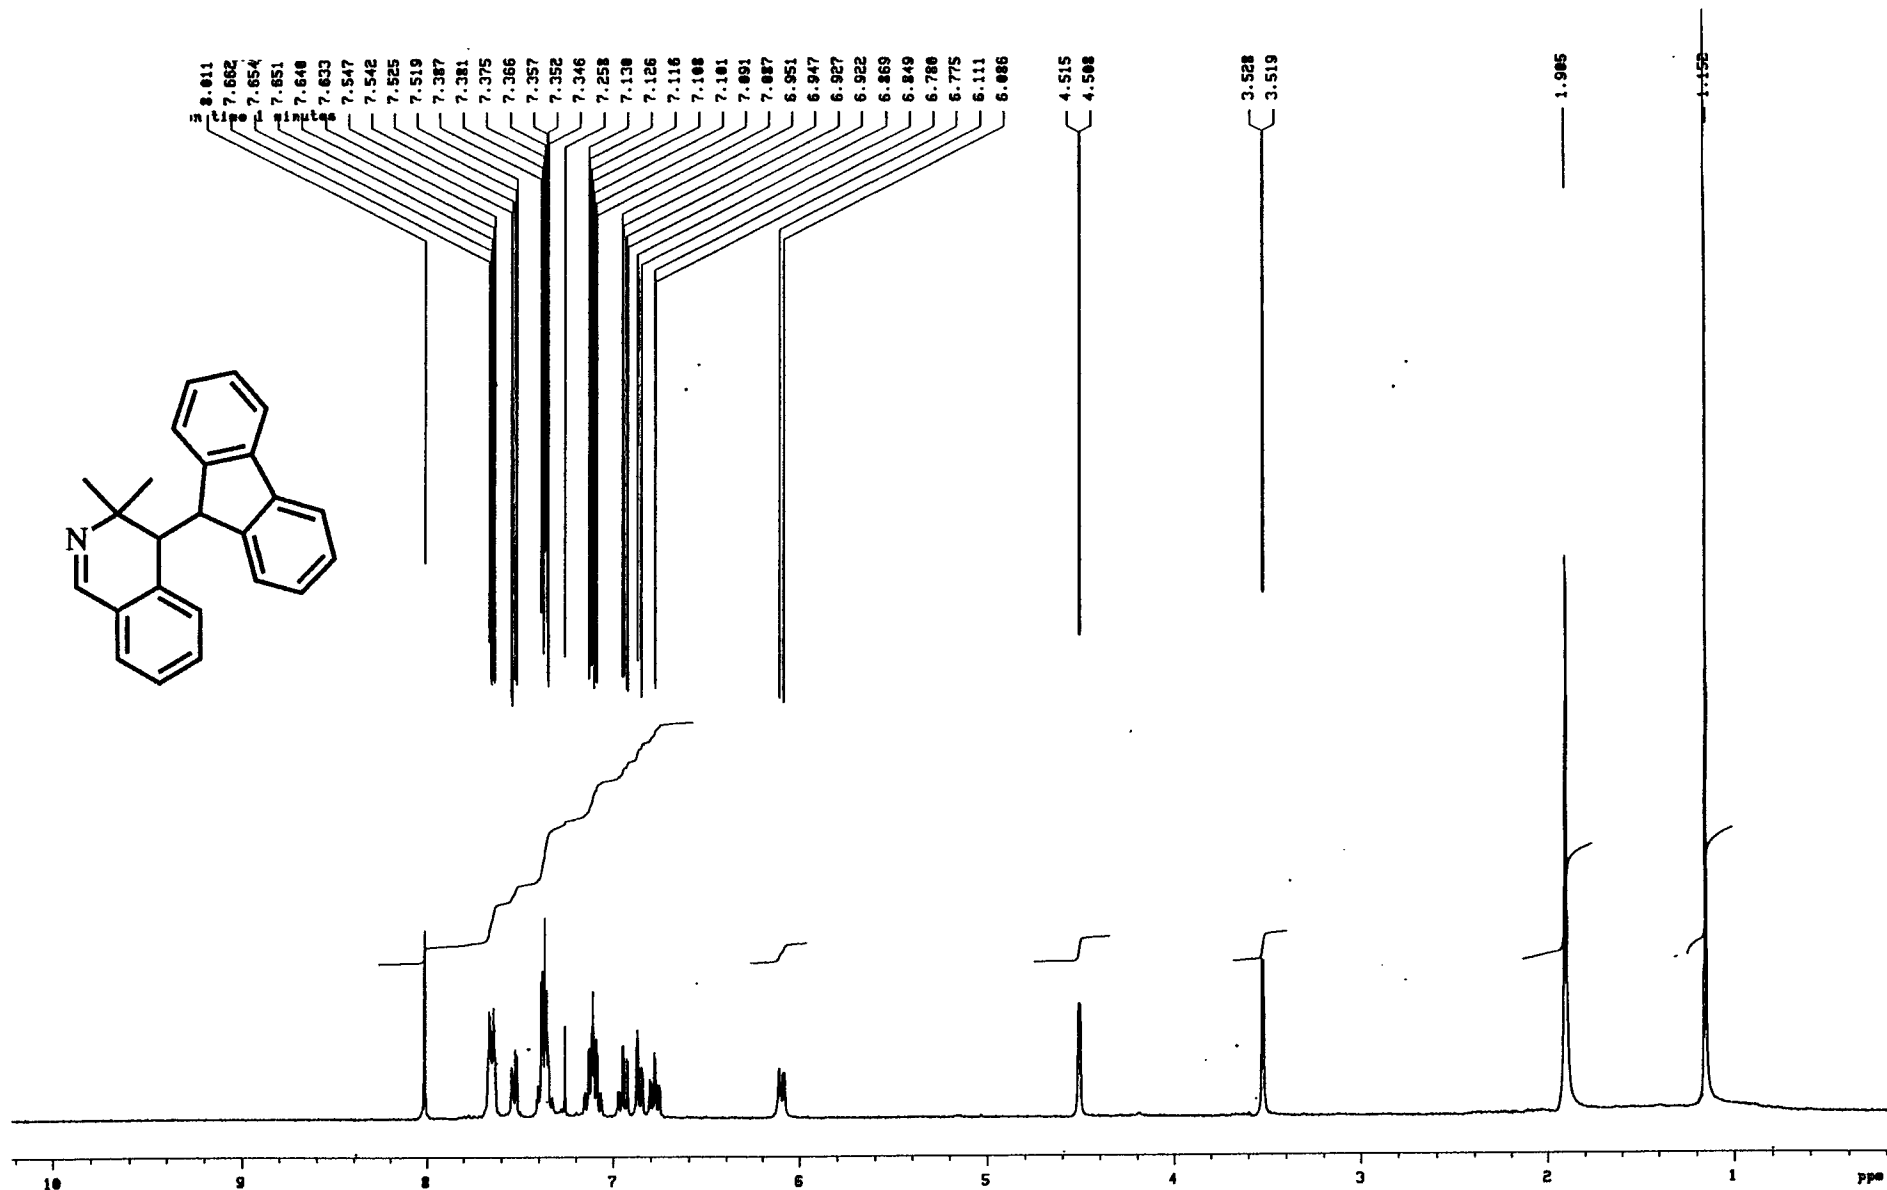

ppm

159.067

146.650  
142.795  
141.721  
141.518

133.994  
130.659  
128.034  
127.505  
127.400  
127.157  
126.771  
126.723  
126.506  
126.186  
125.245  
124.680  
119.541  
118.907

77.367  
77.146  
76.943  
76.519

57.212

49.941  
48.102

28.987  
28.174

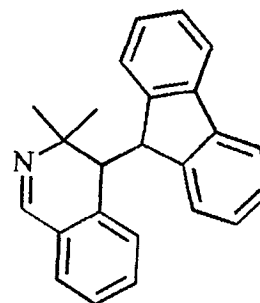

200

180

160

140

120

ppm

100

80

60

40

20

0

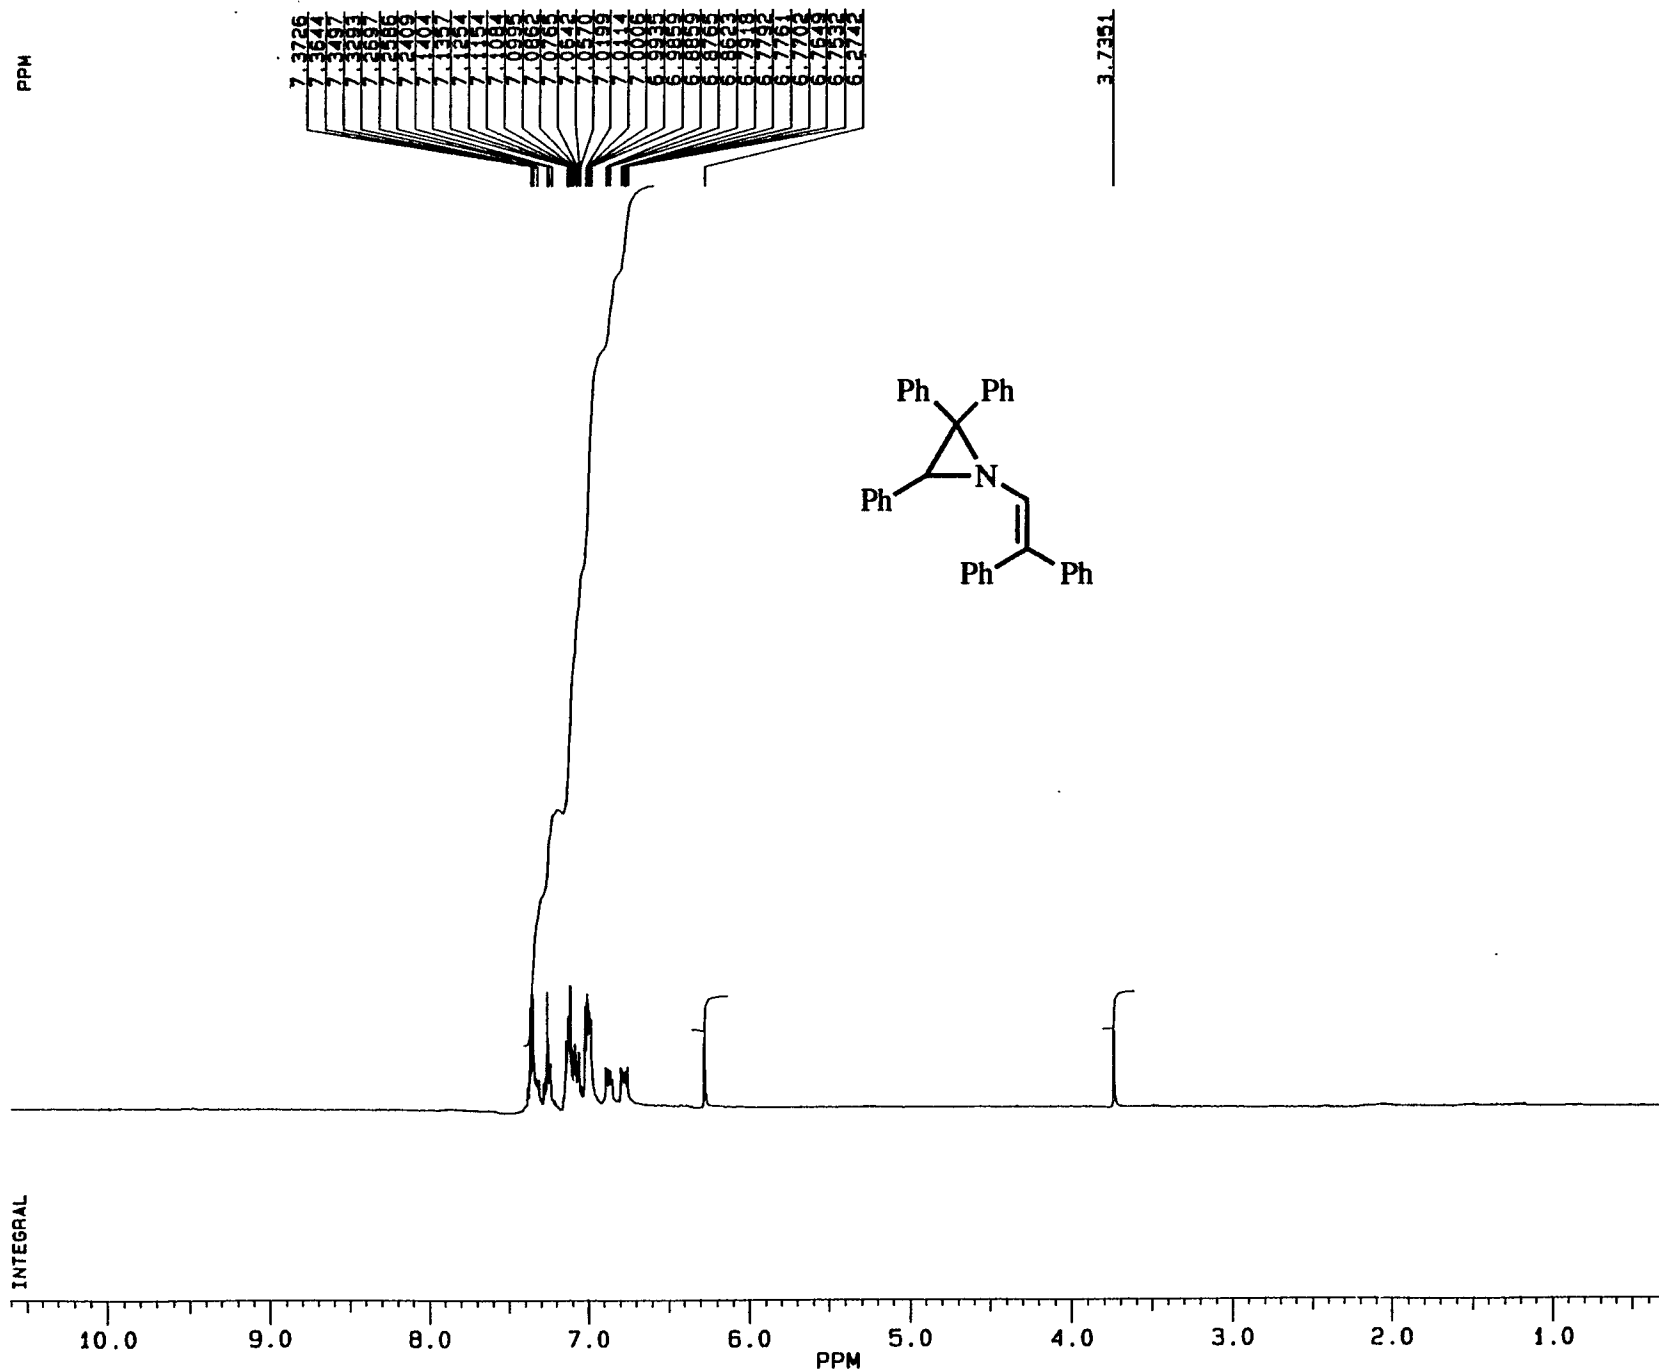

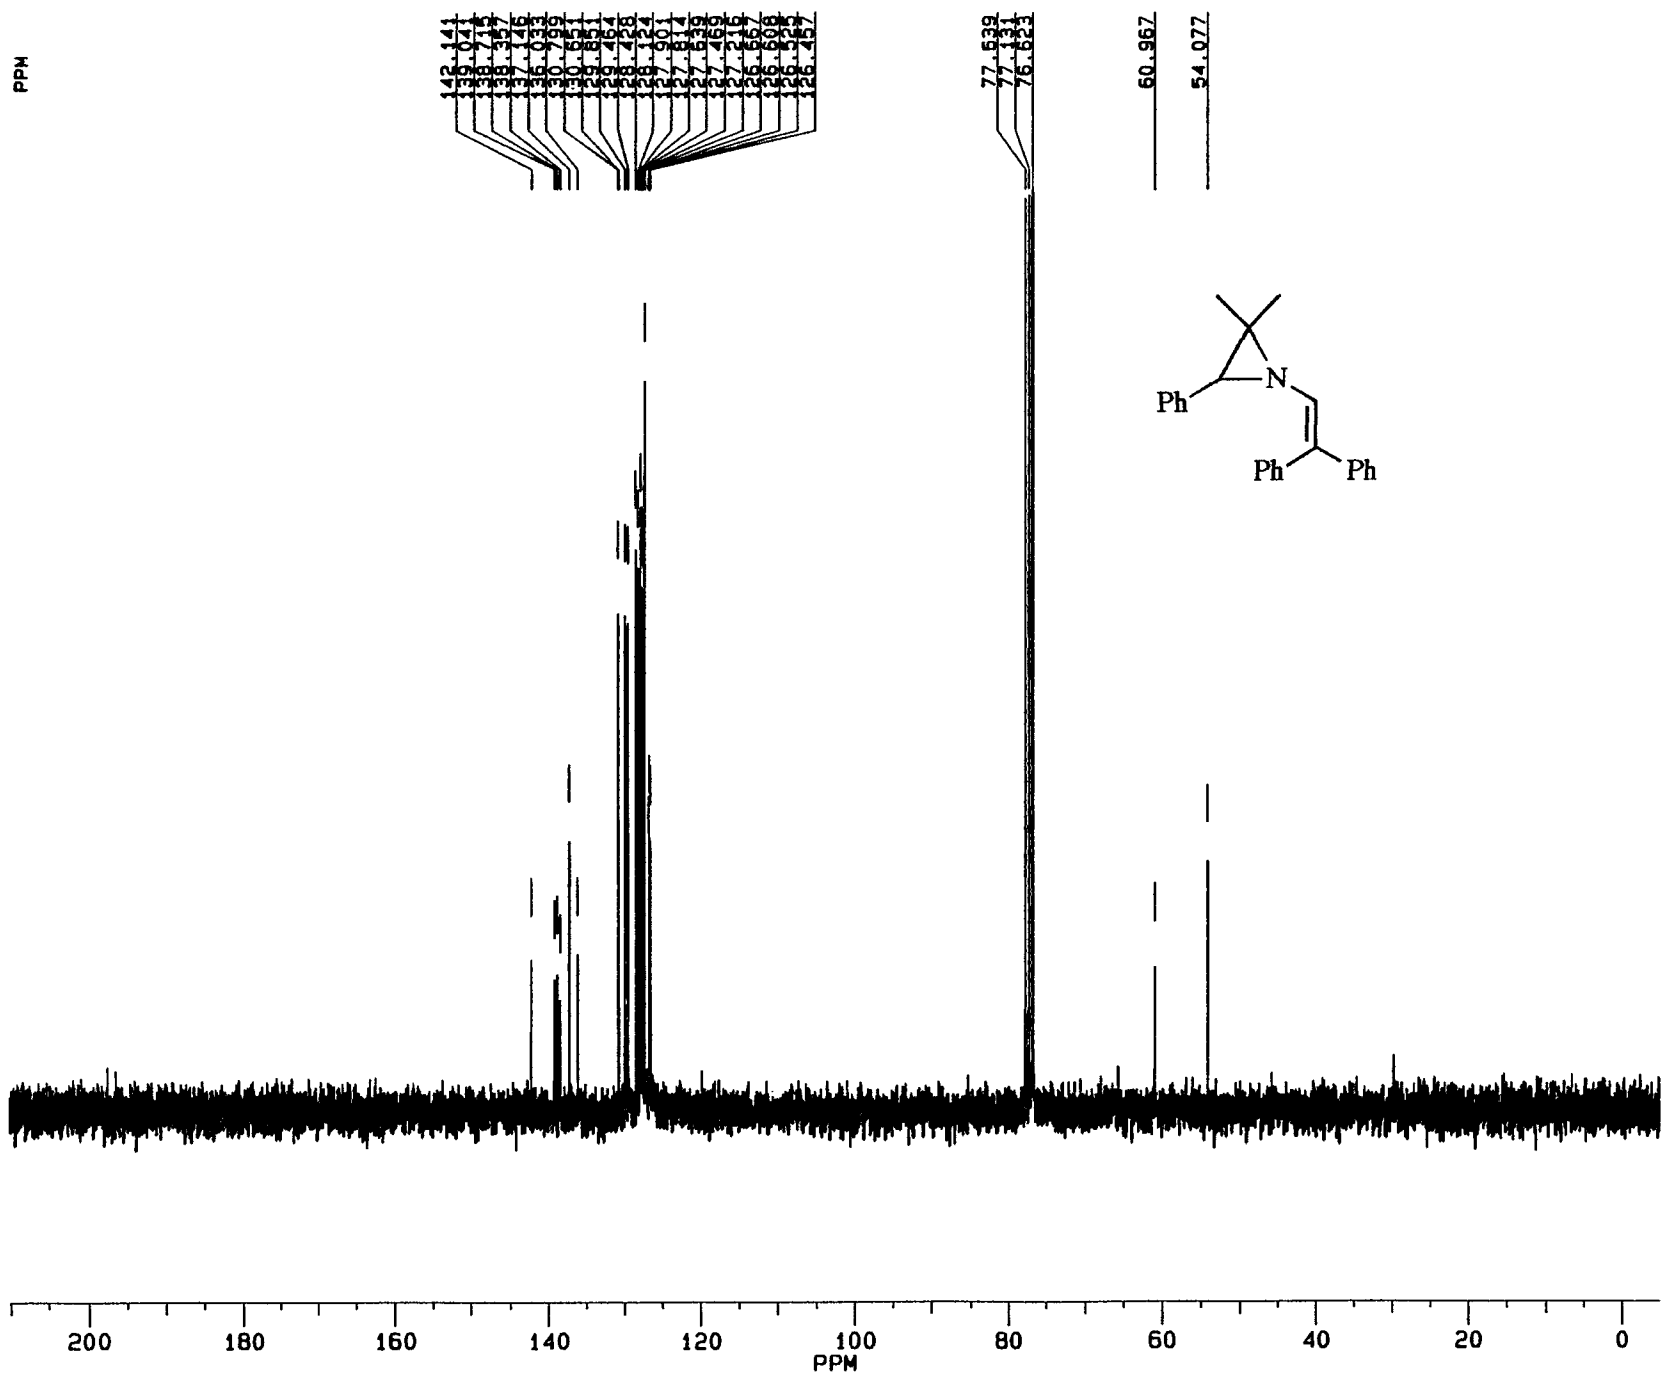

OBSERVE .il  
Frequency 299.949 MHz  
Spectral width 5500.6 Hz  
Acquisition time 1.501 sec  
Relaxation delay 0.000 sec  
Pulse width 90.0 degrees  
Ambient temperature  
No. repetitions 2  
Double precision acquisition  
DATA PROCESSING  
FT size 32768  
Total acquisition time 1 minutes

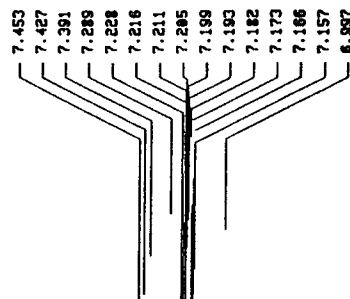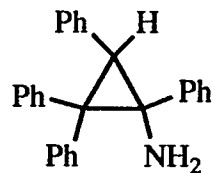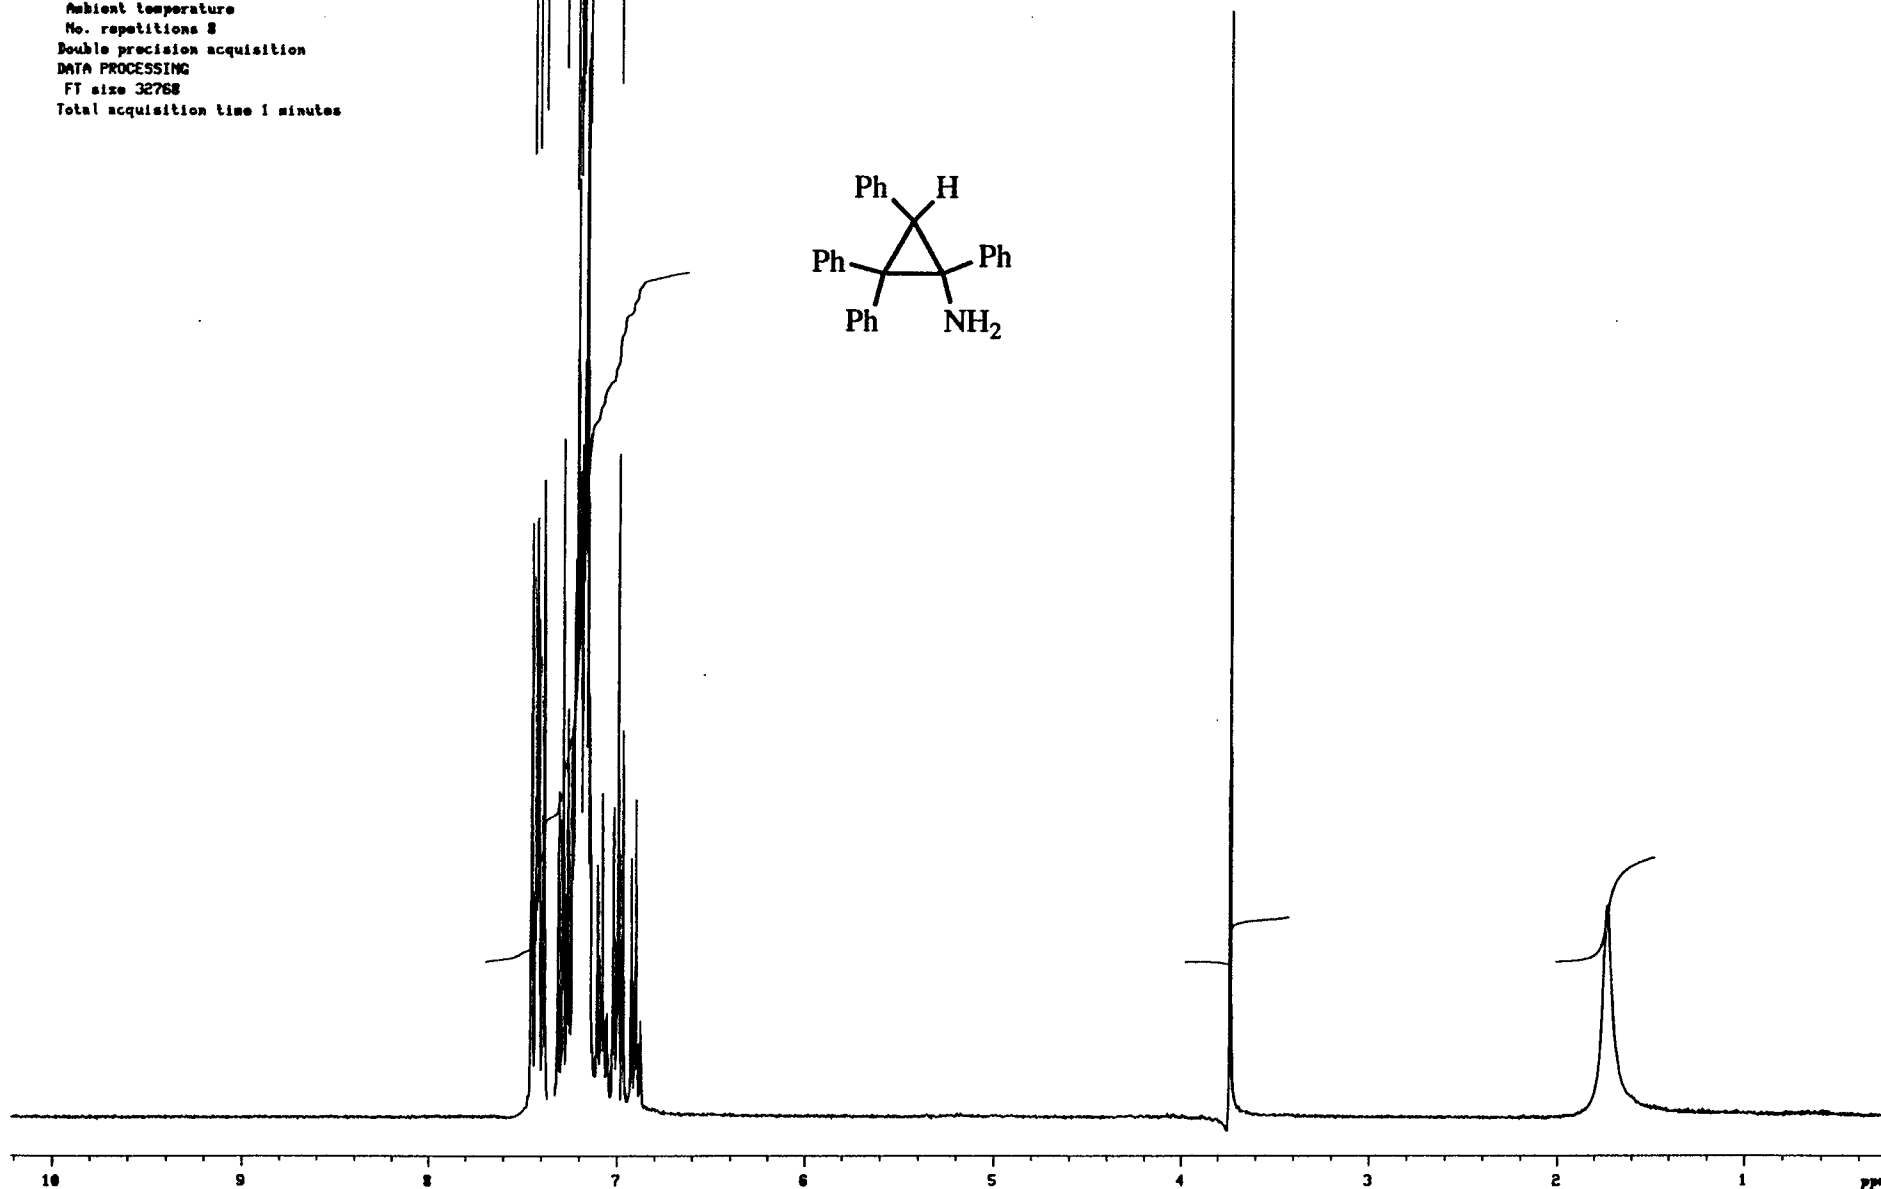



PPM

141.517  
143.626  
138.603  
136.759  
131.952  
130.671  
129.293  
128.041  
127.928  
127.724  
126.574  
126.071  
125.897

77.648  
77.140  
76.632

51.977

47.845

38.873

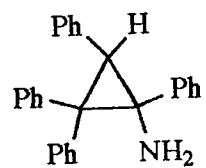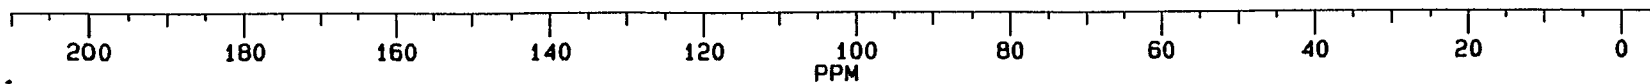

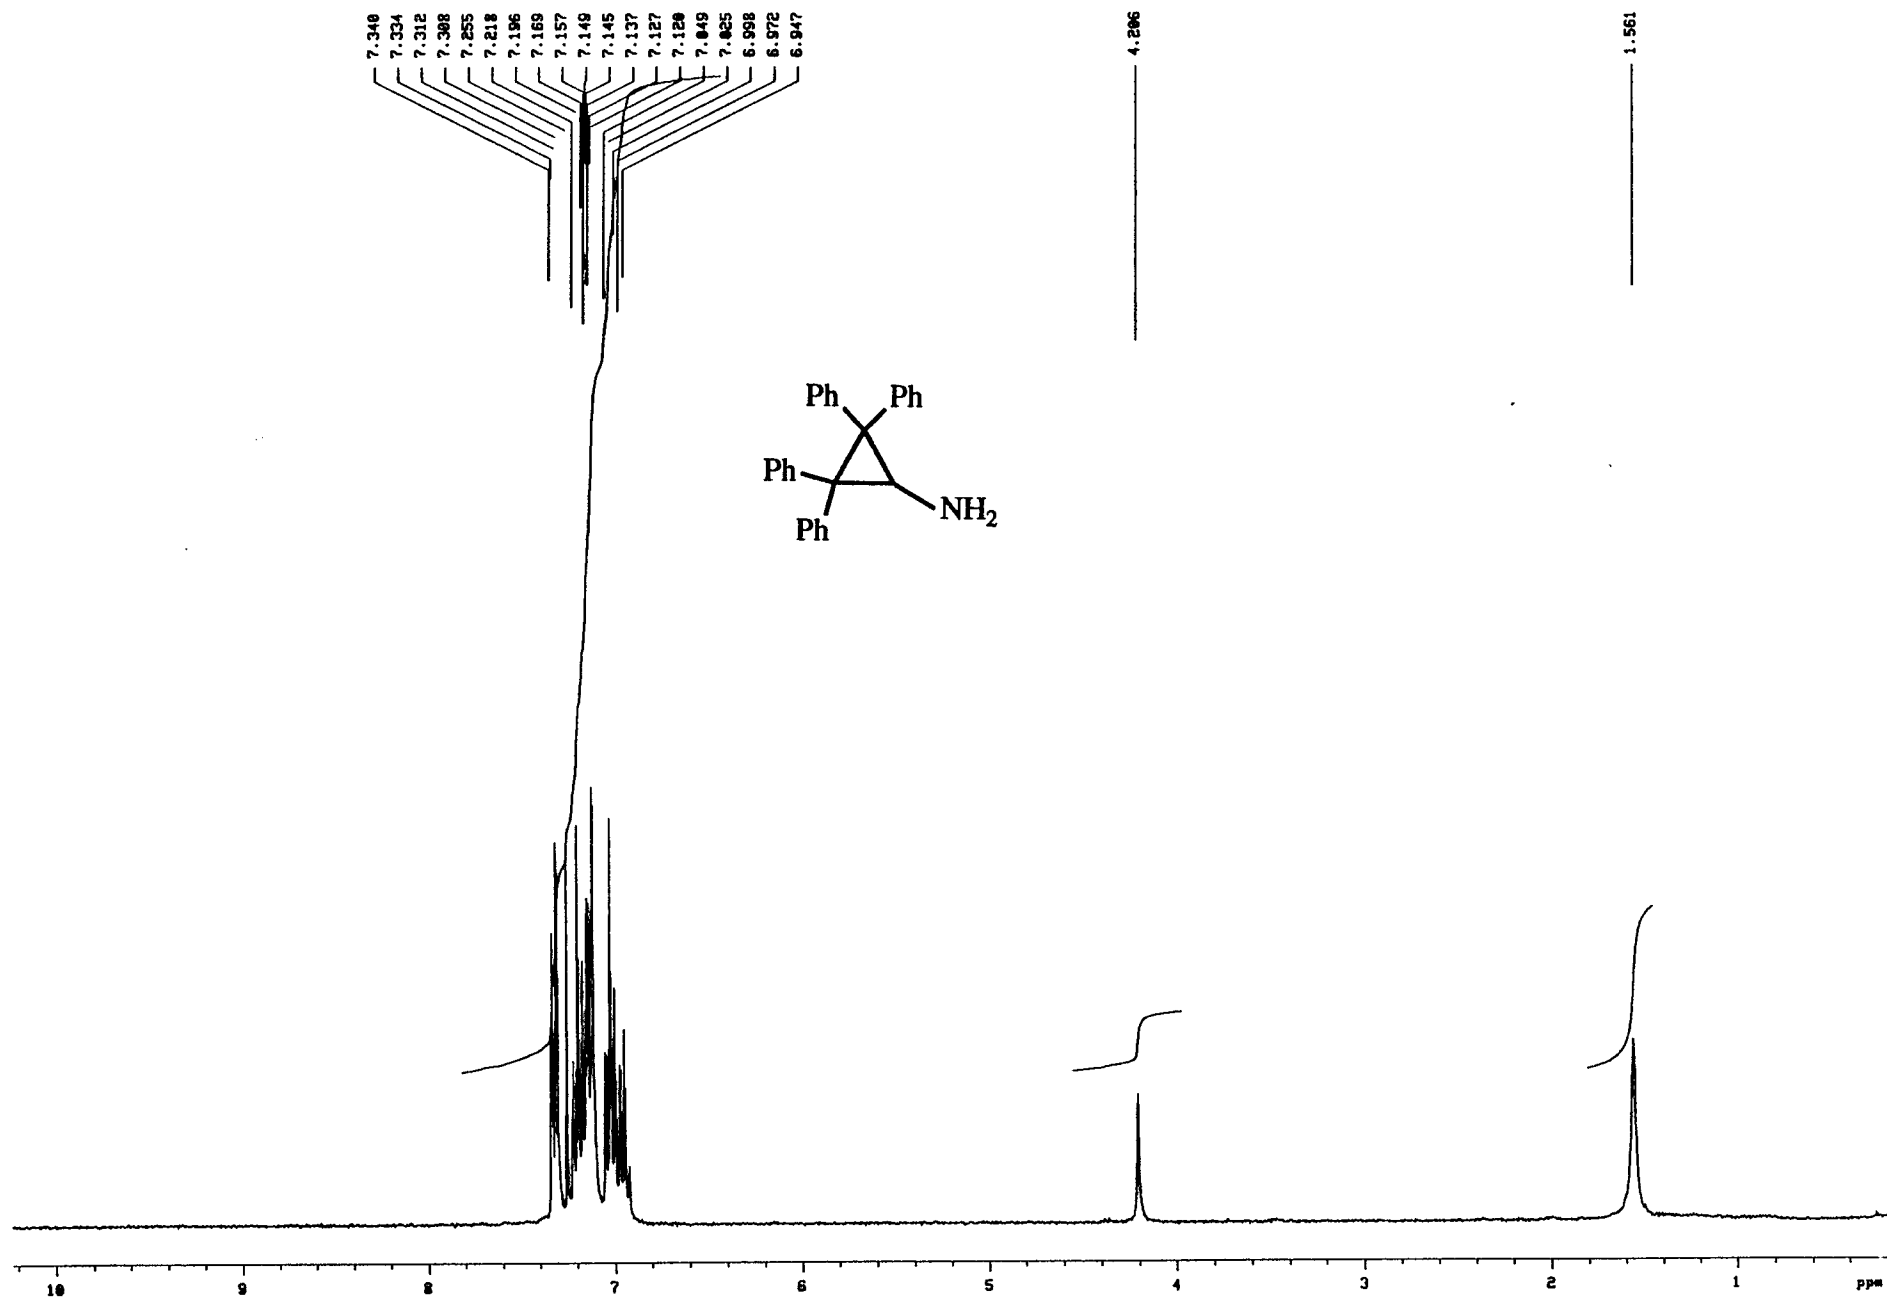

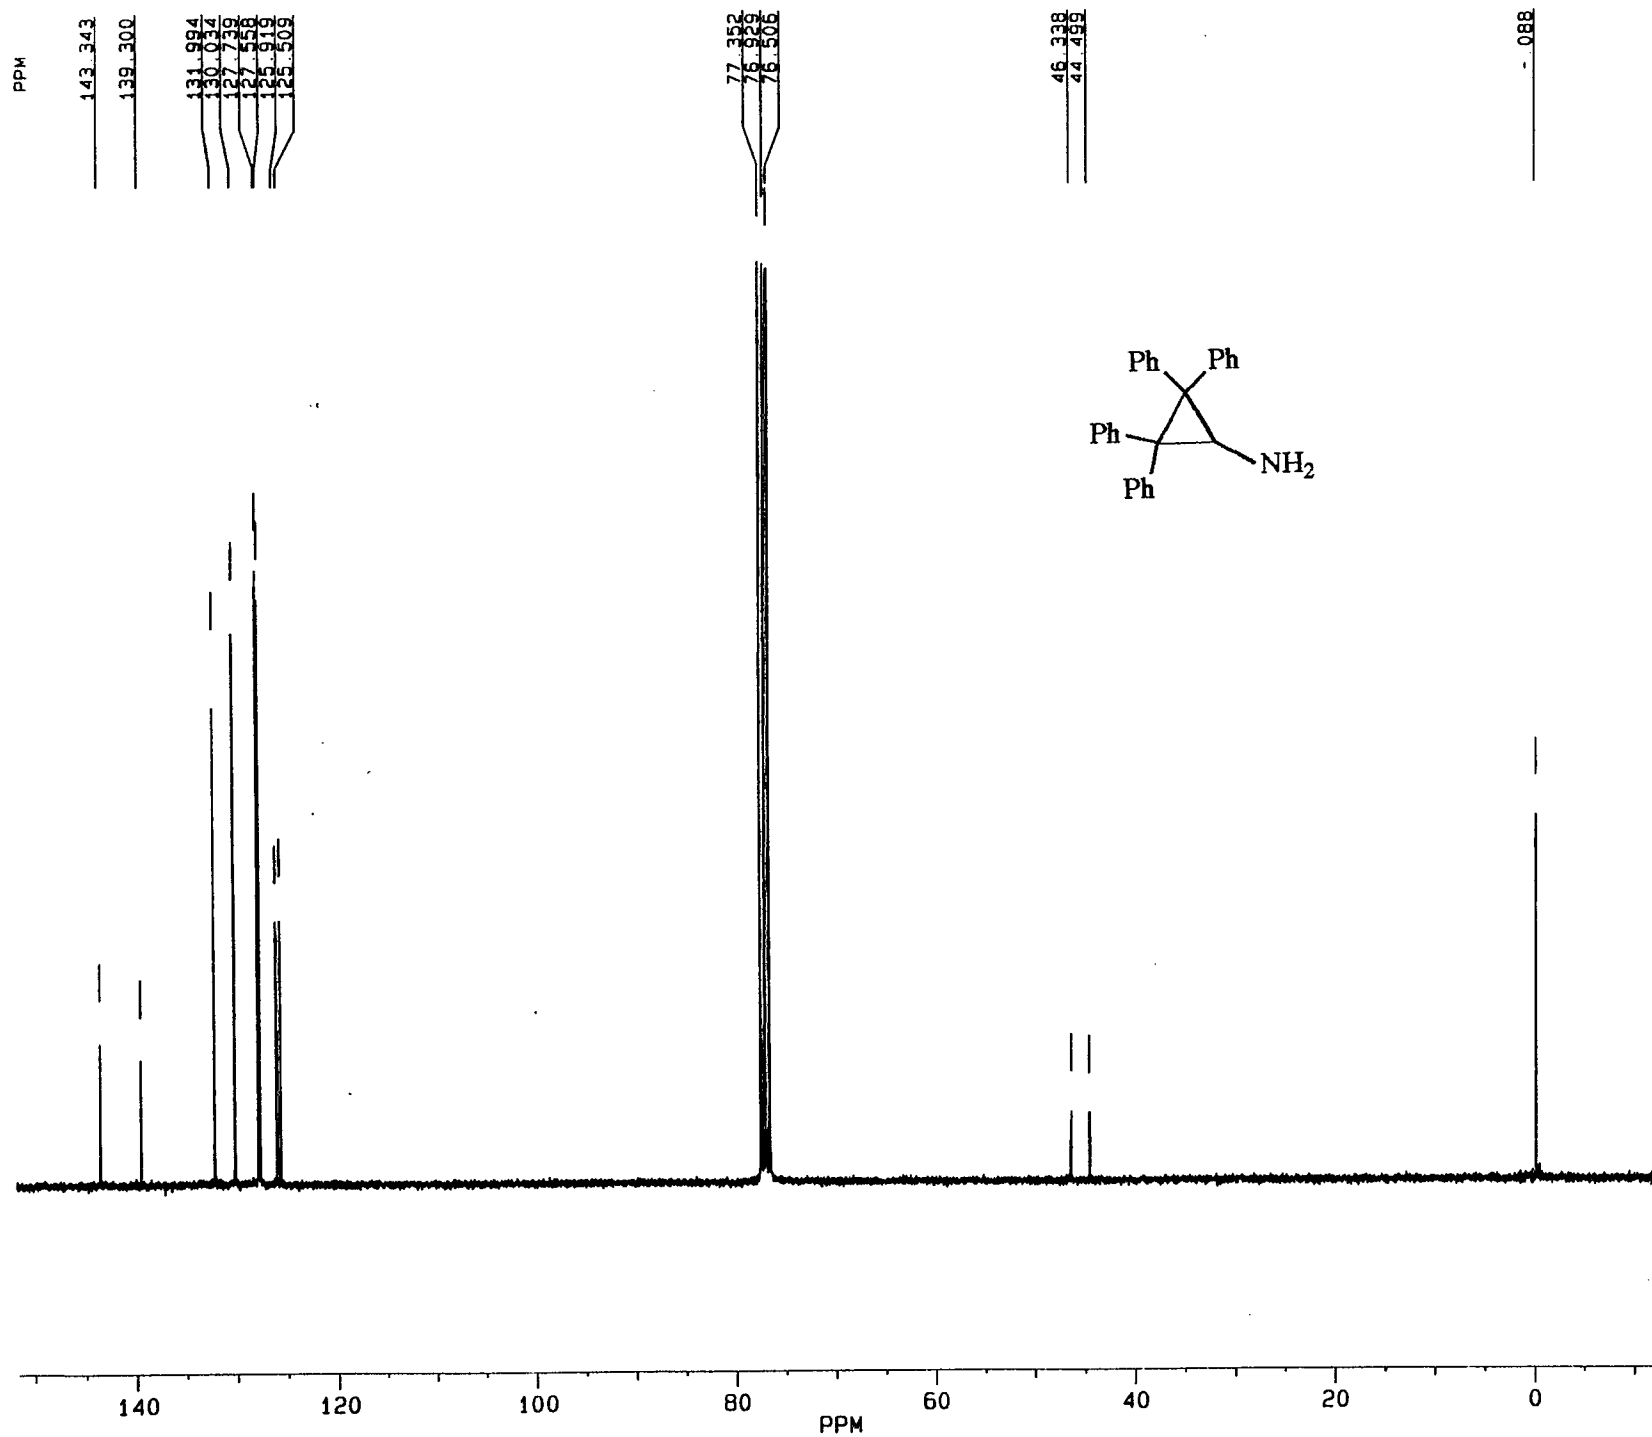

**Table .** Crystal and Refinement Data for C<sub>34</sub>NH<sub>27</sub>

|                                                          |                                                                |
|----------------------------------------------------------|----------------------------------------------------------------|
| Formula                                                  | C <sub>34</sub> NH <sub>27</sub>                               |
| Mol weight                                               | 449.6                                                          |
| Crystal dimensions, mm                                   | 0.3x0.3x0.30                                                   |
| Crystal color                                            | colorless                                                      |
| Crystal system                                           | Triclinic                                                      |
| Space group                                              | P(-1) (N. 2)                                                   |
| Cell dimensions                                          |                                                                |
| <i>a</i> , Å                                             | 10.843(2)                                                      |
| <i>b</i> , Å                                             | 11.223(5)                                                      |
| <i>c</i> , Å                                             | 11.654(3)                                                      |
| α, (°)                                                   | 99.64(2)                                                       |
| β, (°)                                                   | 96.75(2)                                                       |
| γ, (°)                                                   | 111.05(3)                                                      |
| <i>Z</i>                                                 | 2                                                              |
| <i>V</i> , Å <sup>3</sup>                                | 1280.2(8)                                                      |
| <i>D</i> <sub>calcd</sub> , g cm <sup>-3</sup>           | 1.17                                                           |
| <i>F</i> (000)                                           | 476                                                            |
| temp, K                                                  | 295                                                            |
| Diffractometer                                           | Enraf-Nonius                                                   |
| Radiation                                                | graphite-monochromated<br>Mo <i>K</i> α ( <i>l</i> =0.71069 Å) |
| Scan technique                                           | <i>ω</i> / <i>2θ</i>                                           |
| <i>2θ</i> range, °                                       | 1-60                                                           |
| Data collected                                           | -15 ≤ <i>h</i> ≤ 15, -15 ≤ <i>k</i> ≤ 15, 0 ≤ <i>l</i> ≤ 16    |
| Unique data                                              | 7453                                                           |
| Observed reflections, <i>I</i> > 2σ( <i>I</i> )          | 3808                                                           |
| <i>R</i> <sub>int</sub> (%)                              | 1.05                                                           |
| Decay                                                    | <1%                                                            |
| Standard reflections                                     | 3/75                                                           |
| μ(Mo <i>K</i> α), cm <sup>-1</sup>                       | 0.62                                                           |
| Transmission range                                       | 0.95-0.98                                                      |
| Weighting scheme                                         | unit                                                           |
| Maximum and average shift/error                          | 0.006, 0.001                                                   |
| Absorption correction range                              | none                                                           |
| Maximum residual, eÅ <sup>-3</sup>                       | 0.2                                                            |
| $R = \sum  F_o  -  F_c  / \sum  F_o $                    | 0.042                                                          |
| $R_w = [\sum w( F_o  -  F_c )^2 / \sum w  F_o ^2]^{1/2}$ | 0.040                                                          |
| GOF (F)                                                  | 0.47                                                           |
| Num.Refined Parameters                                   | 316                                                            |
| Reflections/parameter ratio                              | 12.05                                                          |

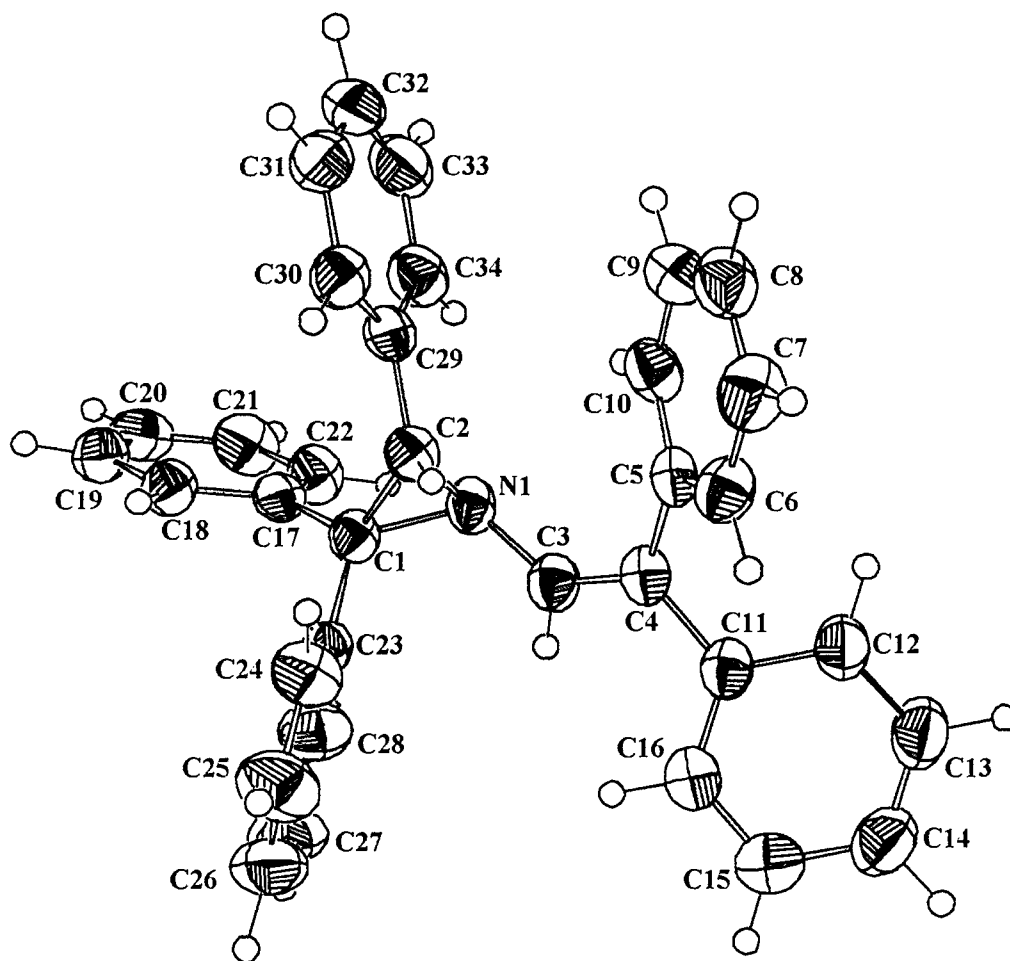

FIGURE \*: ORTEP drawing of the molecule of  $C_{34}NH_{27}$  with 50% probability ellipsoids. The labeling of hydrogen atoms has been omitted for clarity

## EXPERIMENTAL

### 1. Data Collection

A colorless crystal of prismatic shape and dimension  $0.30 \times 0.30 \times 0.30 \text{ mm}^3$  was cut from a larger one grown as described in the experimental section. This crystal was mounted in a Nonius CAD-4 diffractometer to be used for the structure determination. Table I collects the main crystal data and refinement parameters for  $\text{C}_{34}\text{NH}_{27}$ . A graphite-monochromatic  $\text{MoK}_\alpha$  ( $\lambda = 0.71069 \text{ \AA}$ ) beam was used in the data collection carried out at room temperature. The unit cell parameters were determined by least-square refinement of the  $2\theta$  values of 25 strong well centered reflections in the range  $12^\circ < 2\theta < 30^\circ$ . The intensities of all 7453 unique reflections (after merging) were measured in the angular range  $1^\circ < 2\theta < 60^\circ$  ( $hkl$  range  $-15, -15, 0$  to  $15, 15, 16$ ) using the  $\omega/2\theta$  scan technique. There was no appreciable change in the intensities of three standard reflections periodically monitored. The raw data were corrected for Lorentz and polarization effects and 3808 reflections were considered as observed with  $I > 2s(I)$ . Scattering factors for neutral atoms were taken from "*International Tables for X-Ray Crystallography*" (1).

### 2. Structure Determination

The position of non-hydrogen atoms were determined using the direct-methods program MULTAN80 (2). The hydrogen atoms were located by Fourier synthesis. Due to the regular crystal shape and to the low absorption coefficient no absorption correction was applied. Since no trends on  $\Delta F$  vs.  $F_o$  or  $\sin\theta/\lambda$  were observed no especial weighting scheme was used, i.e. unit weights were assigned. A final refinement was undertaken with anisotropic thermal motion for the non-hydrogen atoms, while the hydrogen atoms positions were refined but keeping the isotropic thermal parameters constant and equal for all of them. Full-matrix least-squares refinement minimizing  $\sum w(|F_o| - |F_c|)^2$  led to agreement factors  $R = 0.042$  and  $R_w = 0.040$ . The maximum and average shift-to-error ratios were 0.006 and 0.001 respectively, while the maximum residual electron density near the C23-C28 phenyl ring was  $0.2 \text{ e \AA}^{-3}$ . Most of the calculations were carried out with the XRAY80 program (3).

- (1) *International Tables for X-Ray Crystallography*; Kynoch Press; Birmingham, U.K., Vol. IV, p 72., (1974)
- (2) P.Main, S.J.Fiske S.E.Hull, L.Lessinger, G.Germain, J.P.Declercq & M.M.Woolfson, MULTAN80, *A System of Computer Programs for the Automatic Solution of Crystal Structures from X-ray Diffraction Data*. Univ. of York, Engalnd, (1980)
- (3) J.M.Stewart, *The X-RAY80 System*; Computer Science Center, University of Maryland, College Park, MD, (1980).
